# Supplementary material
Source: publisher site journal article supplement (https://www.spandidos-publications.com/7373/downloadSupplementary)
Supplement: Supplementary file 1 [file downloadSupplementary]

## Sheet: SCI-gray_Sham-gray
Table SI. Differentially expressed metabolites in gray and white matter.
m/z	ID	ID-number	Compound ID	Metabolites	Class	Formula	Adduct	PPM	Ion mode	VIP	P-value	Adjusted P-value	FC	Average (Sham-gray_matter)	Average (SCI-gray_matter)
174.04088	67	67-1	HMDB0247079	6-Hydroxymethylpterin	Pteridines and derivatives	C7H7N5O2	-H2O-H	1.09655	Neg	7.346	1.78683x10-29	4.08419x10-28	2.04171	51702.4	105561
96.96965	9	9-1	HMDB0303539	Potassium acetate	Carboxylic acids and derivatives	C2H3KO2	-H	0.850142	Neg	4.79182	1.70089x10-15	8.50444x10-15	2.25362	21763.3	49046
146.04580	47	47-2	HMDB0006040	N2-Methylguanine	Imidazopyrimidines	C6H7N5O	-H2O-H	2.48372	Neg	3.9569	1.05442x10-17	6.48875x10-17	2.45147	13516	33134
146.04580	47	47-1	HMDB0000897	7-Methylguanine	Imidazopyrimidines	C6H7N5O	-H2O-H	2.48372	Neg	3.9569	1.05442x10-17	6.48875x10-17	2.45147	13516	33134
132.03014	30	30-2	HMDB0000403	2-Hydroxyadenine	Imidazopyrimidines	C5H5N5O	-H2O-H	2.75481	Neg	3.08002	4.65119x10-29	9.30238x10-28	2.34851	7620.65	17897.2
132.03014	30	30-3	HMDB0000542	8-Hydroxyadenine	Imidazopyrimidines	C5H5N5O	-H2O-H	2.75481	Neg	3.08002	4.65119x10-29	9.30238x10-28	2.34851	7620.65	17897.2
132.03014	30	30-1	HMDB0000132	Guanine	Imidazopyrimidines	C5H5N5O	-H2O-H	2.75481	Neg	3.08002	4.65119x10-29	9.30238x10-28	2.34851	7620.65	17897.2
133.01412	32	32-3	HMDB0039790	Tetrahydro-2-methyl-3-thiophenethiol	Thiolanes	C5H10S2	-H	0.5664	Neg	3.01579	1.32255x10-41	5.29019x10-40	1.70856	11699.9	19990
133.01412	32	32-2	HMDB0039789	Tetrahydro-2-methyl-2-thiophenethiol	Thiolanes	C5H10S2	-H	0.5664	Neg	3.01579	1.32255x10-41	5.29019x10-40	1.70856	11699.9	19990
133.01412	32	32-1	HMDB0038974	3,3-Dimethyl-1,2-dithiolane	Dithiolanes	C5H10S2	-H	0.5664	Neg	3.01579	1.32255x10-41	5.29019x10-40	1.70856	11699.9	19990
303.08405	147	147-1	HMDB0252307	Flobufen	Organooxygen compounds	C17H14F2O3	-H	4.19357	Neg	1.54523	2.05044x10-23	2.52362x10-22	2.9757	1315.33	3914.02
255.23343	125	125-1	HMDB0031082	1-Pentadecene	Unsaturated hydrocarbons	C15H30	+FA-H	1.87763	Neg	1.42871	1.32683x10-17	7.86269x10-17	1.2728	9356.7	11909.2
255.23343	125	125-2	HMDB0031083	(E)-7-Pentadecene	Unsaturated hydrocarbons	C15H30	+FA-H	1.87763	Neg	1.42871	1.32683x10-17	7.86269x10-17	1.2728	9356.7	11909.2
116.90717	17	17-1	HMDB0251189	Dichloromethylene	Organochlorides	CCl2	+Cl	0.578225	Neg	1.42702	9.97240x10-63	7.97792x10-61	0.358829	2565.75	920.664
888.62467	247	247-1	HMDB0009311	PE(44:3)	Glycerophospholipids	C49H92NO8P	+Cl	0.244964	Neg	1.3958	2.63611x10-23	2.81185x10-22	2.24649	1309.11	2940.9
888.62467	247	247-2	HMDB0114093	DMPE(42:3)	Glycerophospholipids	C49H92NO8P	+Cl	0.244964	Neg	1.3958	2.63611x10-23	2.81185x10-22	2.24649	1309.11	2940.9
175.02493	68	68-2	HMDB0258965	theophylline one	Imidazopyrimidines	C7H6N4O3	-H2O-H	0.844934	Neg	1.37442	8.07981x10-14	3.40203x10-13	1.4034	5568.7	7815.1
175.02493	68	68-1	HMDB0033245	6-(Hydroxymethyl)-2,4(1H,3H)-pteridinedione	Pteridines and derivatives	C7H6N4O3	-H2O-H	0.844934	Neg	1.37442	8.07981x10-14	3.40203x10-13	1.4034	5568.7	7815.1
211.99662	96	96-1	HMDB0012250	L-Aspartyl-4-phosphate	Carboxylic acids and derivatives	C4H8NO7P	-H	0.257407	Neg	1.36773	2.59072x10-65	4.14515x10-63	2.19246	1017.88	2231.66
303.23286	148	148-1	HMDB0001043	FA(20:4)	Fatty Acyls	C20H32O2	-H	3.22862	Neg	1.34892	3.60466x10-08	9.15470x10-08	1.25486	12488.6	15671.3
303.23286	148	148-2	HMDB0002177	Cis-8,11,14,17-Eicosatetraenoic acid	Fatty Acyls	C20H32O2	-H	3.22862	Neg	1.34892	3.60466x10-08	9.15470x10-08	1.25486	12488.6	15671.3
303.23286	148	148-3	HMDB0006036	Mesterolone	Steroids and steroid derivatives	C20H32O2	-H	3.22862	Neg	1.34892	3.60466x10-08	9.15470x10-08	1.25486	12488.6	15671.3
303.23286	148	148-5	HMDB0036721	ent-17-Hydroxy-16beta-kauran-19-al	Prenol lipids	C20H32O2	-H	3.22862	Neg	1.34892	3.60466x10-08	9.15470x10-08	1.25486	12488.6	15671.3
303.23286	148	148-6	HMDB0036754	Yucalexin P21	Prenol lipids	C20H32O2	-H	3.22862	Neg	1.34892	3.60466x10-08	9.15470x10-08	1.25486	12488.6	15671.3
303.23286	148	148-7	HMDB0036829	Copalic acid	Prenol lipids	C20H32O2	-H	3.22862	Neg	1.34892	3.60466x10-08	9.15470x10-08	1.25486	12488.6	15671.3
303.23286	148	148-4	HMDB0036702	Sideridiol	Prenol lipids	C20H32O2	-H	3.22862	Neg	1.34892	3.60466x10-08	9.15470x10-08	1.25486	12488.6	15671.3
303.23286	148	148-9	HMDB0039687	Oryzalexin S	Prenol lipids	C20H32O2	-H	3.22862	Neg	1.34892	3.60466x10-08	9.15470x10-08	1.25486	12488.6	15671.3
303.23286	148	148-10	HMDB0039702	Oryzalexin E	Phenanthrenes and derivatives	C20H32O2	-H	3.22862	Neg	1.34892	3.60466x10-08	9.15470x10-08	1.25486	12488.6	15671.3
303.23286	148	148-8	HMDB0037824	7,13-Eperudien-15-oic acid	Prenol lipids	C20H32O2	-H	3.22862	Neg	1.34892	3.60466x10-08	9.15470x10-08	1.25486	12488.6	15671.3
145.06186	46	46-1	HMDB0031642	N-Nitroso-pyrrolidine	Pyrrolidines	C4H8N2O	+FA-H	0.0425209	Neg	1.31984	6.35648x10-11	2.11883x10-10	1.88337	3220.38	6065.17
145.06186	46	46-2	HMDB0033952	Gyromitrin	Organonitrogen compounds	C4H8N2O	+FA-H	0.0425209	Neg	1.31984	6.35648x10-11	2.11883x10-10	1.88337	3220.38	6065.17
788.54533	213	213-1	HMDB0010163	PS(36:1)	Glycerophospholipids	C42H80NO10P	-H	2.17499	Neg	1.07824	1.20814x10-18	8.05423x10-18	1.76375	1496.95	2640.25
147.02982	49	49-4	HMDB0303135	trans-Propenyl propyl disulfide	Organic disulfides	C6H12S2	-H	0.847068	Neg	1.07431	1.32258x10-23	1.92375x10-22	2.09012	1103.64	2306.74
147.02982	49	49-2	HMDB0038890	Methyl 3-methyl-1-butenyl disulfide	Organic disulfides	C6H12S2	-H	0.847068	Neg	1.07431	1.32258x10-23	1.92375x10-22	2.09012	1103.64	2306.74
147.02982	49	49-3	HMDB0041392	1-Propenyl propyl disulfide	Organic disulfides	C6H12S2	-H	0.847068	Neg	1.07431	1.32258x10-23	1.92375x10-22	2.09012	1103.64	2306.74
147.02982	49	49-1	HMDB0033912	2-Propenyl propyl disulfide	Allyl sulfur compounds	C6H12S2	-H	0.847068	Neg	1.07431	1.32258x10-23	1.92375x10-22	2.09012	1103.64	2306.74
171.00631	64	64-1	HMDB0012228	Ethylphosphate	Organic phosphoric acids and derivatives	C2H7O4P	+FA-H	0.5196	Neg	1.07176	1.75666x10-23	2.34221x10-22	4.93544	385.563	1902.92
890.63789	249	249-1	HMDB0000024	3-O-Sulfogalactosylceramide (d18:1/24:0)	Phenols	C48H93NO11S	-H	0.830668	Neg	1.06805	5.45529x10-23	5.45529x10-22	2.36652	708.04	1675.59
130.06239	29	29-1	HMDB0000064	Creatine	Carboxylic acids and derivatives	C4H9N3O2	-H	1.48196	Neg	1.06238	6.71358x10-13	2.75429x10-12	2.10584	1438.94	3030.17
130.06239	29	29-2	HMDB0013222	Beta-Guanidinopropionic acid	Organonitrogen compounds	C4H9N3O2	-H	1.48196	Neg	1.06238	6.71358x10-13	2.75429x10-12	2.10584	1438.94	3030.17
885.54946	244	244-1	HMDB0009793	PI(38:4)	Glycerophospholipids	C47H83O13P	-H	0.703671	Neg	1.03463	7.12839x10-31	1.90090x10-29	1.83808	1066.89	1961.03
104.10711	28	28-1	HMDB0244984	2-Amino-3-methyl-1-butanol	Organonitrogen compounds	C5H13NO	+H	1.08344	Pos	17.7619	4.19852x10-54	6.44773x10-52	1.687	444737	750273
317.11371	728	728-3	HMDB0041141	Marshdine	Quinolines and derivatives	C16H13NO5	+NH4	1.43951	Pos	12.0522	2.27766x10-41	1.16594x10-39	1.24189	644480	800372
317.11371	728	728-4	HMDB0041516	Avenanthramide G	Cinnamic acids and derivatives	C16H13NO5	+NH4	1.43951	Pos	12.0522	2.27766x10-41	1.16594x10-39	1.24189	644480	800372
317.11371	728	728-1	HMDB0029284	Avenanthramide 1c	Cinnamic acids and derivatives	C16H13NO5	+NH4	1.43951	Pos	12.0522	2.27766x10-41	1.16594x10-39	1.24189	644480	800372
317.11371	728	728-2	HMDB0038577	(Z)-N-Coumaroyl-5-hydroxyanthranilic acid	Cinnamic acids and derivatives	C16H13NO5	+NH4	1.43951	Pos	12.0522	2.27766x10-41	1.16594x10-39	1.24189	644480	800372
132.07641	81	81-2	HMDB0003646	N-Methylhydantoin	Azolines	C4H6N2O2	+NH4	2.73067	Pos	8.05444	1.15980x10-70	6.23393x10-68	1.399	141128	197438
132.07641	81	81-1	HMDB0000076	Dihydrouracil	Diazines	C4H6N2O2	+NH4	2.73067	Pos	8.05444	1.15980x10-70	6.23393x10-68	1.399	141128	197438
170.03260	199	199-2	HMDB0013222	Beta-Guanidinopropionic acid	Organonitrogen compounds	C4H9N3O2	+K	0.207655	Pos	6.81116	6.23781x10-70	2.23522x10-67	1.49001	85768.7	127797
170.03260	199	199-1	HMDB0000064	Creatine	Carboxylic acids and derivatives	C4H9N3O2	+K	0.207655	Pos	6.81116	6.23781x10-70	2.23522x10-67	1.49001	85768.7	127797
207.07794	333	333-1	HMDB0249075	Benzyl phenyl ether	Phenol ethers	C13H12O	+Na	0.67194	Pos	5.867	3.26954x10-81	3.51475x10-78	1.62067	46295.3	75029.6
154.05819	149	149-2	HMDB0013222	Beta-Guanidinopropionic acid	Organonitrogen compounds	C4H9N3O2	+Na	3.30462	Pos	5.65294	2.99810x10-63	8.05739x10-61	1.38572	75130.2	104109
154.05819	149	149-1	HMDB0000064	Creatine	Carboxylic acids and derivatives	C4H9N3O2	+Na	3.30462	Pos	5.65294	2.99810x10-63	8.05739x10-61	1.38572	75130.2	104109
255.06258	525	525-1	HMDB0030813	Cassiachromone	Benzopyrans	C13H12O4	+Na	0.930018	Pos	5.06225	2.43991x10-34	7.08892x10-33	1.23166	125881	155043
255.06258	525	525-5	HMDB0255452	Naphthoxylactic acid	Naphthalenes	C13H12O4	+Na	0.930018	Pos	5.06225	2.43991x10-34	7.08892x10-33	1.23166	125881	155043
255.06258	525	525-3	HMDB0038911	(2S,3S,4S)-5,7,9,11-Tridecatetrayne-1,2,3,4-tetrol	Fatty Acyls	C13H12O4	+Na	0.930018	Pos	5.06225	2.43991x10-34	7.08892x10-33	1.23166	125881	155043
255.06258	525	525-4	HMDB0041325	Salfredin B11	Benzopyrans	C13H12O4	+Na	0.930018	Pos	5.06225	2.43991x10-34	7.08892x10-33	1.23166	125881	155043
255.06258	525	525-2	HMDB0033330	Dihydrocoriandrin	Benzopyrans	C13H12O4	+Na	0.930018	Pos	5.06225	2.43991x10-34	7.08892x10-33	1.23166	125881	155043
318.11732	730	730-1	HMDB0255287	N(6),O(2)-Dimethyladenosine	Purine nucleosides	C12H17N5O4	+Na	0.0224615	Pos	4.95031	3.73169x10-38	1.54291x10-36	1.24185	111912	138979
318.11732	730	730-2	HMDB0255293	N2-Ethyl-2'-deoxyguanosine	Purine nucleosides	C12H17N5O4	+Na	0.0224615	Pos	4.95031	3.73169x10-38	1.54291x10-36	1.24185	111912	138979
104.07068	26	26-1	HMDB0000092	Dimethylglycine	Carboxylic acids and derivatives	C4H9NO2	+H	0.579005	Pos	4.18492	4.74350x10-24	7.84502x10-23	1.47702	47380	69981.4
104.07068	26	26-4	HMDB0000650	D-alpha-Aminobutyric acid	Carboxylic acids and derivatives	C4H9NO2	+H	0.579005	Pos	4.18492	4.74350x10-24	7.84502x10-23	1.47702	47380	69981.4
104.07068	26	26-5	HMDB0001906	2-Aminoisobutyric acid	Carboxylic acids and derivatives	C4H9NO2	+H	0.579005	Pos	4.18492	4.74350x10-24	7.84502x10-23	1.47702	47380	69981.4
104.07068	26	26-8	HMDB0003911	3-Aminoisobutanoic acid	Carboxylic acids and derivatives	C4H9NO2	+H	0.579005	Pos	4.18492	4.74350x10-24	7.84502x10-23	1.47702	47380	69981.4
104.07068	26	26-9	HMDB0031329	Butyl nitrite	Organonitrogen compounds	C4H9NO2	+H	0.579005	Pos	4.18492	4.74350x10-24	7.84502x10-23	1.47702	47380	69981.4
104.07068	26	26-6	HMDB0002166	(S)-beta-Aminoisobutyric acid	Carboxylic acids and derivatives	C4H9NO2	+H	0.579005	Pos	4.18492	4.74350x10-24	7.84502x10-23	1.47702	47380	69981.4
104.07068	26	26-11	HMDB0041945	N-Ethylglycine	Carboxylic acids and derivatives	C4H9NO2	+H	0.579005	Pos	4.18492	4.74350x10-24	7.84502x10-23	1.47702	47380	69981.4
104.07068	26	26-2	HMDB0000112	gamma-Aminobutyric acid	Carboxylic acids and derivatives	C4H9NO2	+H	0.579005	Pos	4.18492	4.74350x10-24	7.84502x10-23	1.47702	47380	69981.4
104.07068	26	26-3	HMDB0000452	L-alpha-Aminobutyric acid	Carboxylic acids and derivatives	C4H9NO2	+H	0.579005	Pos	4.18492	4.74350x10-24	7.84502x10-23	1.47702	47380	69981.4
104.07068	26	26-7	HMDB0002299	(R)-beta-Aminoisobutyric acid	Carboxylic acids and derivatives	C4H9NO2	+H	0.579005	Pos	4.18492	4.74350x10-24	7.84502x10-23	1.47702	47380	69981.4
104.07068	26	26-10	HMDB0031654	3-Aminobutanoic acid	Carboxylic acids and derivatives	C4H9NO2	+H	0.579005	Pos	4.18492	4.74350x10-24	7.84502x10-23	1.47702	47380	69981.4
189.05176	265	265-1	HMDB0244601	2-(Sec-butyldisulfanyl)-1h-imidazole	Azoles	C7H12N2S2	+H	1.48533	Pos	3.88215	5.85212x10-46	4.19402x10-44	1.34285	45619.3	61259.9
145.02576	114	114-1	HMDB0303720	Sodium benzoate	Benzene and substituted derivatives	C7H5NaO2	+H	1.69278	Pos	3.55736	5.67800x10-48	4.35989x10-46	1.26506	47603.8	60221.8
213.05178	361	361-1	HMDB0032991	7-Methoxy-6-methyl-2H-1-benzopyran-2-one	Coumarins and derivatives	C11H10O3	+Na	2.31491	Pos	3.39761	3.45567x10-49	3.37713x10-47	1.32509	35318.2	46799.7
213.05178	361	361-2	HMDB0039359	Methyl (Z,Z)-10-hydroxy-2,8-decadiene-4,6-diynoate	Fatty Acyls	C11H10O3	+Na	2.31491	Pos	3.39761	3.45567x10-49	3.37713x10-47	1.32509	35318.2	46799.7
213.05178	361	361-5	HMDB0040938	Coixinden A	Indenes and isoindenes	C11H10O3	+Na	2.31491	Pos	3.39761	3.45567x10-49	3.37713x10-47	1.32509	35318.2	46799.7
213.05178	361	361-6	HMDB0041122	(S)-2,3-Dihydro-5-hydroxy-2-methyl-1,4-naphthoquinone	Naphthalenes	C11H10O3	+Na	2.31491	Pos	3.39761	3.45567x10-49	3.37713x10-47	1.32509	35318.2	46799.7
213.05178	361	361-3	HMDB0040326	7-Hydroxy-2,5-dimethyl-4H-1-benzopyran-4-one	Benzopyrans	C11H10O3	+Na	2.31491	Pos	3.39761	3.45567x10-49	3.37713x10-47	1.32509	35318.2	46799.7
213.05178	361	361-4	HMDB0040731	Avenalumic acid	Benzene and substituted derivatives	C11H10O3	+Na	2.31491	Pos	3.39761	3.45567x10-49	3.37713x10-47	1.32509	35318.2	46799.7
213.05178	361	361-7	HMDB0247248	7-Ethoxycoumarin	Coumarins and derivatives	C11H10O3	+Na	2.31491	Pos	3.39761	3.45567x10-49	3.37713x10-47	1.32509	35318.2	46799.7
319.11239	733	733-2	HMDB0245678	4-Nitrophenyl beta-D-glucopyranoside	Organooxygen compounds	C12H15NO8	+NH4	3.90983	Pos	2.99492	1.12489x10-34	3.45502x10-33	1.23931	43163.1	53492.7
319.11239	733	733-1	HMDB0244855	2-Nitrophenyl a-D-galactopyranoside	Organooxygen compounds	C12H15NO8	+NH4	3.90983	Pos	2.99492	1.12489x10-34	3.45502x10-33	1.23931	43163.1	53492.7
127.02671	71	71-2	HMDB0252088	Ethylurea	Organic carbonic acids and derivatives	C3H8N2O	+K	0.840775	Pos	2.86983	6.01259x10-44	3.40186x10-42	1.26693	31927.1	40449.6
127.02671	71	71-3	HMDB0253863	L-alaninamide	Carboxylic acids and derivatives	C3H8N2O	+K	0.840775	Pos	2.86983	6.01259x10-44	3.40186x10-42	1.26693	31927.1	40449.6
127.02671	71	71-1	HMDB0244027	1,1-Dimethylurea	Organic carbonic acids and derivatives	C3H8N2O	+K	0.840775	Pos	2.86983	6.01259x10-44	3.40186x10-42	1.26693	31927.1	40449.6
201.08853	310	310-1	HMDB0031864	Methyleugenol	Benzene and substituted derivatives	C11H14O2	+Na	0.513168	Pos	2.58208	2.36027x10-13	1.49252x10-12	1.13308	88846.8	100670
201.08853	310	310-5	HMDB0040411	Ethyl 3-phenylpropanoate	Fatty Acyls	C11H14O2	+Na	0.513168	Pos	2.58208	2.36027x10-13	1.49252x10-12	1.13308	88846.8	100670
201.08853	310	310-3	HMDB0036385	Methyl 4-phenylbutanoate	Fatty Acyls	C11H14O2	+Na	0.513168	Pos	2.58208	2.36027x10-13	1.49252x10-12	1.13308	88846.8	100670
201.08853	310	310-4	HMDB0038179	3-(2-Hydroxy-4-methylphenyl)-2-butanone	Prenol lipids	C11H14O2	+Na	0.513168	Pos	2.58208	2.36027x10-13	1.49252x10-12	1.13308	88846.8	100670
201.08853	310	310-2	HMDB0035013	2-Phenylethyl propanoate	Benzene and substituted derivatives	C11H14O2	+Na	0.513168	Pos	2.58208	2.36027x10-13	1.49252x10-12	1.13308	88846.8	100670
233.07845	440	440-1	HMDB0013070	Sinapyl alcohol	Phenols	C11H14O4	+Na	0.129898	Pos	2.4463	2.36089x10-48	1.95227x10-46	1.32275	19075.4	25232
175.00159	218	218-1	HMDB0000157	Hypoxanthine	Imidazopyrimidines	C5H4N4O	+K	0.653431	Pos	2.10241	6.63215x10-63	1.42591x10-60	1.71459	5513.69	9453.72
193.06222	280	280-1	HMDB0032412	Methyl beta-naphthyl ketone	Naphthalenes	C12H10O	+Na	1.07173	Pos	2.09885	1.25184x10-54	2.24288x10-52	1.68141	6275.26	10551.3
193.06222	280	280-3	HMDB0034446	Diphenyl ether	Benzene and substituted derivatives	C12H10O	+Na	1.07173	Pos	2.09885	1.25184x10-54	2.24288x10-52	1.68141	6275.26	10551.3
193.06222	280	280-2	HMDB0032582	2-Biphenylol	Benzene and substituted derivatives	C12H10O	+Na	1.07173	Pos	2.09885	1.25184x10-54	2.24288x10-52	1.68141	6275.26	10551.3
210.19596	351	351-2	HMDB0252283	Hydroxypropylcellulose	Benzene and substituted derivatives	C12H20N2	+NH4	2.53206	Pos	1.90368	4.07175x10-28	8.58261x10-27	1.40825	10528.9	14827.3
210.19596	351	351-1	HMDB0248301	Amiflamina	Benzene and substituted derivatives	C12H20N2	+NH4	2.53206	Pos	1.90368	4.07175x10-28	8.58261x10-27	1.40825	10528.9	14827.3
210.19596	351	351-3	HMDB0259120	Trenbolone acetate	Pyrrolidines	C12H20N2	+NH4	2.53206	Pos	1.90368	4.07175x10-28	8.58261x10-27	1.40825	10528.9	14827.3
199.03630	302	302-3	HMDB0032883	1,4,5-Naphthalenetriol	Naphthalenes	C10H8O3	+Na	1.5699	Pos	1.81243	3.70809x10-36	1.32873x10-34	1.30821	11969.5	15658.7
199.03630	302	302-2	HMDB0031054	10-Hydroxy-2,8-decadiene-4,6-diynoic acid	Fatty Acyls	C10H8O3	+Na	1.5699	Pos	1.81243	3.70809x10-36	1.32873x10-34	1.30821	11969.5	15658.7
199.03630	302	302-7	HMDB0251931	Erythrocentaurin	Benzopyrans	C10H8O3	+Na	1.5699	Pos	1.81243	3.70809x10-36	1.32873x10-34	1.30821	11969.5	15658.7
199.03630	302	302-4	HMDB0032990	7-Hydroxy-6-methyl-2H-1-benzopyran-2-one	Coumarins and derivatives	C10H8O3	+Na	1.5699	Pos	1.81243	3.70809x10-36	1.32873x10-34	1.30821	11969.5	15658.7
199.03630	302	302-1	HMDB0029758	Herniarin	Coumarins and derivatives	C10H8O3	+Na	1.5699	Pos	1.81243	3.70809x10-36	1.32873x10-34	1.30821	11969.5	15658.7
199.03630	302	302-5	HMDB0033813	3-(3,4-Methylenedioxyphenyl)propenal	Benzodioxoles	C10H8O3	+Na	1.5699	Pos	1.81243	3.70809x10-36	1.32873x10-34	1.30821	11969.5	15658.7
199.03630	302	302-6	HMDB0059622	4-Methylumbelliferone	Coumarins and derivatives	C10H8O3	+Na	1.5699	Pos	1.81243	3.70809x10-36	1.32873x10-34	1.30821	11969.5	15658.7
199.03630	302	302-8	HMDB0303033	8-Methoxycoumarin	Coumarins and derivatives	C10H8O3	+Na	1.5699	Pos	1.81243	3.70809x10-36	1.32873x10-34	1.30821	11969.5	15658.7
208.08133	338	338-1	HMDB0240294	2-O-Methylascorbic acid	Dihydrofurans	C7H10O6	+NH4	1.12815	Pos	1.70324	6.58937x10-53	7.87064x10-51	1.54465	5099.39	7876.79
223.07257	400	400-3	HMDB0036460	Safynol	Fatty Acyls	C13H12O2	+Na	1.94732	Pos	1.66695	6.46586x10-36	2.24219x10-34	1.36173	8754.46	11921.2
223.07257	400	400-2	HMDB0030646	(Z)-3-(1-Butenyl)-1H-2-benzopyran-1-one	Isocoumarins and derivatives	C13H12O2	+Na	1.94732	Pos	1.66695	6.46586x10-36	2.24219x10-34	1.36173	8754.46	11921.2
223.07257	400	400-7	HMDB0245676	1-(4-Methoxy-1-naphthyl)ethanone	Naphthalenes	C13H12O2	+Na	1.94732	Pos	1.66695	6.46586x10-36	2.24219x10-34	1.36173	8754.46	11921.2
223.07257	400	400-4	HMDB0240711	Bisphenol F	Benzene and substituted derivatives	C13H12O2	+Na	1.94732	Pos	1.66695	6.46586x10-36	2.24219x10-34	1.36173	8754.46	11921.2
223.07257	400	400-9	HMDB0250959	Dehydrotremetone	Benzofurans	C13H12O2	+Na	1.94732	Pos	1.66695	6.46586x10-36	2.24219x10-34	1.36173	8754.46	11921.2
223.07257	400	400-6	HMDB0245357	2,2'-Methylenediphenol	Benzene and substituted derivatives	C13H12O2	+Na	1.94732	Pos	1.66695	6.46586x10-36	2.24219x10-34	1.36173	8754.46	11921.2
223.07257	400	400-11	HMDB0303824	(7E)-4-Deoxy-2,3-dihydromycosinol	Organooxygen compounds	C13H12O2	+Na	1.94732	Pos	1.66695	6.46586x10-36	2.24219x10-34	1.36173	8754.46	11921.2
223.07257	400	400-8	HMDB0245967	(3-Phenoxyphenyl)methanol	Benzene and substituted derivatives	C13H12O2	+Na	1.94732	Pos	1.66695	6.46586x10-36	2.24219x10-34	1.36173	8754.46	11921.2
223.07257	400	400-10	HMDB0302506	4-Deoxy-2,3-dihydromycosinol	Organooxygen compounds	C13H12O2	+Na	1.94732	Pos	1.66695	6.46586x10-36	2.24219x10-34	1.36173	8754.46	11921.2
223.07257	400	400-1	HMDB0014738	Monobenzone	Phenols	C13H12O2	+Na	1.94732	Pos	1.66695	6.46586x10-36	2.24219x10-34	1.36173	8754.46	11921.2
223.07257	400	400-5	HMDB0244965	2-[Hydroxy(phenyl)methyl]phenol	Benzene and substituted derivatives	C13H12O2	+Na	1.94732	Pos	1.66695	6.46586x10-36	2.24219x10-34	1.36173	8754.46	11921.2
159.02729	164	164-1	HMDB0031160	1-Pentanesulfenothioic acid	Sulfenyl compounds	C5H12S2	+Na	0.191179	Pos	1.6093	1.29868x10-48	1.16340x10-46	1.64415	3814.63	6271.82
136.04779	91	91-1	HMDB0000562	Creatinine	Carboxylic acids and derivatives	C4H7N3O	+Na	2.75698	Pos	1.60747	3.55411x10-36	1.31747x10-34	1.34386	8285.57	11134.7
225.08804	413	413-1	HMDB0030816	6-Acetyl-2,2-dimethyl-2H-1-benzopyran	Benzopyrans	C13H14O2	+Na	2.67043	Pos	1.59179	7.04039x10-36	2.36513x10-34	1.28827	9895.19	12747.7
225.08804	413	413-2	HMDB0031663	3-(3-Methylbutylidene)-1(3H)-isobenzofuranone	Isocoumarans	C13H14O2	+Na	2.67043	Pos	1.59179	7.04039x10-36	2.36513x10-34	1.28827	9895.19	12747.7
225.08804	413	413-3	HMDB0259119	Tremetone	Benzene and substituted derivatives	C13H14O2	+Na	2.67043	Pos	1.59179	7.04039x10-36	2.36513x10-34	1.28827	9895.19	12747.7
296.06536	685	685-1	HMDB0000982	5-Methylcytidine	Pyrimidine nucleosides	C10H15N3O5	+K	3.45883	Pos	1.58954	1.03783x10-42	5.57833x10-41	1.51039	5390.6	8141.9
112.01585	40	40-1	HMDB0240707	Aminomethylphosphonic acid	Organic phosphonic acids and derivatives	CH6NO3P	+H	0.312948	Pos	1.58492	2.82638x10-20	3.45268x10-19	1.20047	17316.2	20787.6
253.11914	519	519-3	HMDB0028699	Alanyltyrosine	Carboxylic acids and derivatives	C12H16N2O4	+H	3.21068	Pos	1.58267	1.96344x10-34	5.86306x10-33	1.2697	10204.4	12956.5
253.11914	519	519-6	HMDB0029098	Tyrosyl-Alanine	Carboxylic acids and derivatives	C12H16N2O4	+H	3.21068	Pos	1.58267	1.96344x10-34	5.86306x10-33	1.2697	10204.4	12956.5
253.11914	519	519-2	HMDB0013941	Epoxy-hexobarbital	Diazines	C12H16N2O4	+H	3.21068	Pos	1.58267	1.96344x10-34	5.86306x10-33	1.2697	10204.4	12956.5
253.11914	519	519-4	HMDB0029004	Phenylalanylserine	Carboxylic acids and derivatives	C12H16N2O4	+H	3.21068	Pos	1.58267	1.96344x10-34	5.86306x10-33	1.2697	10204.4	12956.5
253.11914	519	519-1	HMDB0013940	3'-Hydroxyhexobarbital	Diazines	C12H16N2O4	+H	3.21068	Pos	1.58267	1.96344x10-34	5.86306x10-33	1.2697	10204.4	12956.5
253.11914	519	519-5	HMDB0029046	Serylphenylalanine	Carboxylic acids and derivatives	C12H16N2O4	+H	3.21068	Pos	1.58267	1.96344x10-34	5.86306x10-33	1.2697	10204.4	12956.5
233.02025	439	439-1	HMDB0256496	Phosphovanillin	Organic phosphoric acids and derivatives	C8H9O6P	+H	3.21657	Pos	1.57883	4.46075x10-31	1.11519x10-29	1.28881	10270.6	13236.9
137.07056	96	96-1	HMDB0003152	N-Methylnicotinamide	Pyridines and derivatives	C7H8N2O	+H	2.88408	Pos	1.57324	3.51581x10-44	2.09972x10-42	1.68749	3902.88	6586.05
241.08280	472	472-2	HMDB0250015	(S,E)-2-(5-Hydroxy-8,9-dihydro-5H-benzo[7]annulen-6(7H)-ylidene)acetic acid	Unclassified	C13H14O3	+Na	3.24189	Pos	1.55575	3.51532x10-39	1.57457x10-37	1.35416	7369.18	9979.05
241.08280	472	472-1	HMDB0040358	(R)-Bitalin A	Benzene and substituted derivatives	C13H14O3	+Na	3.24189	Pos	1.55575	3.51532x10-39	1.57457x10-37	1.35416	7369.18	9979.05
241.08280	472	472-3	HMDB0256835	Propranolol glycol	Naphthalenes	C13H14O3	+Na	3.24189	Pos	1.55575	3.51532x10-39	1.57457x10-37	1.35416	7369.18	9979.05
152.04708	137	137-1	HMDB0011664	3-Methylene-indolenine	Indoles and derivatives	C9H7N	+Na	0.108434	Pos	1.53301	2.31146x10-40	1.12946x10-38	1.36719	7095.27	9700.59
181.06213	241	241-3	HMDB0060322	1-Hydroxymethylnaphthalene	Naphthalenes	C11H10O	+Na	1.38607	Pos	1.53007	2.90074x10-52	3.11830x10-50	1.54209	4212.59	6496.19
181.06213	241	241-2	HMDB0060303	(2-Naphthyl)methanol	Naphthalenes	C11H10O	+Na	1.38607	Pos	1.53007	2.90074x10-52	3.11830x10-50	1.54209	4212.59	6496.19
181.06213	241	241-1	HMDB0032861	2-Methoxynaphthalene	Naphthalenes	C11H10O	+Na	1.38607	Pos	1.53007	2.90074x10-52	3.11830x10-50	1.54209	4212.59	6496.19
133.07997	85	85-2	HMDB0302370	4-(Methylthio)-butanonitrile	Organonitrogen compounds	C5H9NS	+NH4	4.34903	Pos	1.52302	2.98202x10-44	1.88569x10-42	1.41779	5771.87	8183.31
133.07997	85	85-1	HMDB0302325	D-2-Butylisothiocyanate	Isothiocyanates	C5H9NS	+NH4	4.34903	Pos	1.52302	2.98202x10-44	1.88569x10-42	1.41779	5771.87	8183.31
307.04358	705	705-1	HMDB0000195	Inosine	Purine nucleosides	C10H12N4O5	+K	1.23555	Pos	1.50739	8.64262x10-35	2.73259x10-33	1.47652	5316.72	7850.24
307.04358	705	705-3	HMDB0003040	Arabinosylhypoxanthine	Purine nucleosides	C10H12N4O5	+K	1.23555	Pos	1.50739	8.64262x10-35	2.73259x10-33	1.47652	5316.72	7850.24
307.04358	705	705-2	HMDB0000481	Allopurinol riboside	Pyrazolo[3,4-d]pyrimidine glycosides	C10H12N4O5	+K	1.23555	Pos	1.50739	8.64262x10-35	2.73259x10-33	1.47652	5316.72	7850.24
209.05683	343	343-1	HMDB0032708	1-Naphthaleneacetic acid	Naphthalenes	C12H10O2	+Na	2.38894	Pos	1.4697	1.54999x10-29	3.62226x10-28	1.28286	9231.28	11842.5
209.05683	343	343-5	HMDB0246489	4-Methoxy-1-naphthaldehyde	Naphthalenes	C12H10O2	+Na	2.38894	Pos	1.4697	1.54999x10-29	3.62226x10-28	1.28286	9231.28	11842.5
209.05683	343	343-6	HMDB0246987	2-Naphthylacetic acid	Naphthalenes	C12H10O2	+Na	2.38894	Pos	1.4697	1.54999x10-29	3.62226x10-28	1.28286	9231.28	11842.5
209.05683	343	343-4	HMDB0245250	2-Naphthyl acetate	Naphthalenes	C12H10O2	+Na	2.38894	Pos	1.4697	1.54999x10-29	3.62226x10-28	1.28286	9231.28	11842.5
209.05683	343	343-2	HMDB0243757	[1,1'-Biphenyl]-2,3'-diol	Benzene and substituted derivatives	C12H10O2	+Na	2.38894	Pos	1.4697	1.54999x10-29	3.62226x10-28	1.28286	9231.28	11842.5
209.05683	343	343-3	HMDB0243958	1-Naphthyl acetate	Naphthalenes	C12H10O2	+Na	2.38894	Pos	1.4697	1.54999x10-29	3.62226x10-28	1.28286	9231.28	11842.5
209.05683	343	343-8	HMDB0301834	Eutypine	Organooxygen compounds	C12H10O2	+Na	2.38894	Pos	1.4697	1.54999x10-29	3.62226x10-28	1.28286	9231.28	11842.5
209.05683	343	343-7	HMDB0247086	6-Methoxy-2-naphthaldehyde	Naphthalenes	C12H10O2	+Na	2.38894	Pos	1.4697	1.54999x10-29	3.62226x10-28	1.28286	9231.28	11842.5
177.08838	228	228-1	HMDB0244259	1,N6-Ethenoadenine	Imidazopyrimidines	C7H5N5	+NH4	0.248177	Pos	1.42779	1.20622x10-36	4.63101x10-35	1.65664	3356.8	5561.01
217.04689	375	375-1	HMDB0000954	Ferulic acid	Cinnamic acids and derivatives	C10H10O4	+Na	1.0955	Pos	1.4039	1.73211x10-23	2.69858x10-22	1.22977	11008.8	13538.3
165.08826	183	183-5	HMDB0031343	Methyl cyclohexanecarboxylate	Carboxylic acids and derivatives	C8H14O2	+Na	2.20751	Pos	1.38742	1.74234x10-44	1.17064x10-42	1.65768	2941.24	4875.62
165.08826	183	183-2	HMDB0013902	2-ene-Valproic acid	Fatty Acyls	C8H14O2	+Na	2.20751	Pos	1.38742	1.74234x10-44	1.17064x10-42	1.65768	2941.24	4875.62
165.08826	183	183-4	HMDB0031293	2,3-Octanedione	Organooxygen compounds	C8H14O2	+Na	2.20751	Pos	1.38742	1.74234x10-44	1.17064x10-42	1.65768	2941.24	4875.62
165.08826	183	183-3	HMDB0013903	(3Z)-2-Propylpent-3-enoic acid	Fatty Acyls	C8H14O2	+Na	2.20751	Pos	1.38742	1.74234x10-44	1.17064x10-42	1.65768	2941.24	4875.62
165.08826	183	183-6	HMDB0040215	cis-3-Hexenyl acetate	Carboxylic acids and derivatives	C8H14O2	+Na	2.20751	Pos	1.38742	1.74234x10-44	1.17064x10-42	1.65768	2941.24	4875.62
165.08826	183	183-1	HMDB0013897	4-ene-Valproic acid	Fatty Acyls	C8H14O2	+Na	2.20751	Pos	1.38742	1.74234x10-44	1.17064x10-42	1.65768	2941.24	4875.62
869.45568	2705	2705-1	HMDB0274423	PGP(a-15:0/18:1(12Z)-2OH(9,10))	Unclassified	C39H76O15P2	+Na	0.595526	Pos	1.34477	3.31161x10-22	4.81078x10-21	0.3229	3490.22	1126.99
869.45568	2705	2705-2	HMDB0274424	PGP(18:1(12Z)-2OH(9,10)/a-15:0)	Unclassified	C39H76O15P2	+Na	0.595526	Pos	1.34477	3.31161x10-22	4.81078x10-21	0.3229	3490.22	1126.99
869.45568	2705	2705-3	HMDB0275151	PGP(i-15:0/18:1(12Z)-2OH(9,10))	Unclassified	C39H76O15P2	+Na	0.595526	Pos	1.34477	3.31161x10-22	4.81078x10-21	0.3229	3490.22	1126.99
869.45568	2705	2705-4	HMDB0275152	PGP(18:1(12Z)-2OH(9,10)/i-15:0)	Unclassified	C39H76O15P2	+Na	0.595526	Pos	1.34477	3.31161x10-22	4.81078x10-21	0.3229	3490.22	1126.99
196.18052	292	292-1	HMDB0246317	4-[(2S)-2-Aminopropyl]-N,3-dimethylaniline	Benzene and substituted derivatives	C11H18N2	+NH4	1.61869	Pos	1.33406	2.59863x10-10	1.09122x10-09	1.30389	10829.2	14120.1
196.18052	292	292-2	HMDB0303880	2-isopentyl-3,6-dimethyl pyrazine	Diazines	C11H18N2	+NH4	1.61869	Pos	1.33406	2.59863x10-10	1.09122x10-09	1.30389	10829.2	14120.1
319.12087	734	734-1	HMDB0245477	2,4,5-Triphenylimidazole	Azoles	C21H16N2	+Na	0.700009	Pos	1.28909	3.30084x10-26	6.45164x10-25	1.26207	8226.09	10381.9
146.16487	118	118-1	HMDB0001257	Spermidine	Organonitrogen compounds	C7H19N3	+H	2.31385	Pos	1.28621	6.88552x10-06	1.64854x10-05	1.11723	54914.1	61351.9
814.42410	2606	2606-1	HMDB0260702	PE(14:1(9Z)/6 keto-PGF1alpha)	Unclassified	C39H70NO12P	+K	3.22167	Pos	1.26907	9.88625x10-20	1.15519x10-18	0.403951	3923.04	1584.71
814.42410	2606	2606-2	HMDB0260703	PE(6 keto-PGF1alpha/14:1(9Z))	Unclassified	C39H70NO12P	+K	3.22167	Pos	1.26907	9.88625x10-20	1.15519x10-18	0.403951	3923.04	1584.71
814.42410	2606	2606-3	HMDB0260712	PE(14:1(9Z)/TXB2)	Unclassified	C39H70NO12P	+K	3.22167	Pos	1.26907	9.88625x10-20	1.15519x10-18	0.403951	3923.04	1584.71
814.42410	2606	2606-4	HMDB0260713	PE(TXB2/14:1(9Z))	Unclassified	C39H70NO12P	+K	3.22167	Pos	1.26907	9.88625x10-20	1.15519x10-18	0.403951	3923.04	1584.71
453.20877	842	842-1	HMDB0253951	Lactose-lysine	Saccharolipids	C18H34N2O12	+H-H2O	0.471739	Pos	1.2555	7.07883x10-39	3.04390x10-37	0.548906	3704.8	2033.58
173.05698	212	212-4	HMDB0011743	2-Phenylpropionate	Phenylpropanoic acids	C9H10O2	+Na	2.12835	Pos	1.23529	1.82581x10-24	3.16572x10-23	1.23058	8835.33	10872.6
173.05698	212	212-1	HMDB0000764	Hydrocinnamic acid	Phenylpropanoic acids	C9H10O2	+Na	2.12835	Pos	1.23529	1.82581x10-24	3.16572x10-23	1.23058	8835.33	10872.6
173.05698	212	212-3	HMDB0002237	3,4-Dimethylbenzoic acid	Benzene and substituted derivatives	C9H10O2	+Na	2.12835	Pos	1.23529	1.82581x10-24	3.16572x10-23	1.23058	8835.33	10872.6
173.05698	212	212-2	HMDB0002222	3-Methylphenylacetic acid	Benzene and substituted derivatives	C9H10O2	+Na	2.12835	Pos	1.23529	1.82581x10-24	3.16572x10-23	1.23058	8835.33	10872.6
280.09122	634	634-1	HMDB0000086	Glycerophosphocholine	Glycerophospholipids	C8H20NO6P	+Na	3.01529	Pos	1.22156	2.09957x10-31	5.37391x10-30	1.37044	5086.41	6970.64
267.09891	584	584-1	HMDB0030636	Batatasin III	Stilbenes	C15H16O3	+Na	1.17966	Pos	1.21753	1.94846x10-29	4.45657x10-28	1.36069	5033.91	6849.6
267.09891	584	584-2	HMDB0030731	3-(1,1-Dimethylallyl)herniarin	Coumarins and derivatives	C15H16O3	+Na	1.17966	Pos	1.21753	1.94846x10-29	4.45657x10-28	1.36069	5033.91	6849.6
267.09891	584	584-3	HMDB0031925	5-Hydroxy-2-(5-methyl-1-oxo-4-hexenyl)benzofuran	Benzofurans	C15H16O3	+Na	1.17966	Pos	1.21753	1.94846x10-29	4.45657x10-28	1.36069	5033.91	6849.6
267.09891	584	584-4	HMDB0032641	Batatasin IV	Stilbenes	C15H16O3	+Na	1.17966	Pos	1.21753	1.94846x10-29	4.45657x10-28	1.36069	5033.91	6849.6
267.09891	584	584-5	HMDB0034723	Encelin	Prenol lipids	C15H16O3	+Na	1.17966	Pos	1.21753	1.94846x10-29	4.45657x10-28	1.36069	5033.91	6849.6
267.09891	584	584-6	HMDB0038548	Glandulone B	Prenol lipids	C15H16O3	+Na	1.17966	Pos	1.21753	1.94846x10-29	4.45657x10-28	1.36069	5033.91	6849.6
203.06787	316	316-2	HMDB0032174	Benzaldehyde glyceryl acetal	Dioxanes	C10H12O3	+Na	0.0607297	Pos	1.2147	4.79713x10-29	1.07436x10-27	1.30246	6054.78	7886.12
203.06787	316	316-3	HMDB0032574	Propylparaben	Benzene and substituted derivatives	C10H12O3	+Na	0.0607297	Pos	1.2147	4.79713x10-29	1.07436x10-27	1.30246	6054.78	7886.12
203.06787	316	316-1	HMDB0031240	2-Phenyl-1,3-dioxolane-4-methanol	Benzene and substituted derivatives	C10H12O3	+Na	0.0607297	Pos	1.2147	4.79713x10-29	1.07436x10-27	1.30246	6054.78	7886.12
203.06787	316	316-5	HMDB0062773	10-hydroxy-(2E,8E)-decadien-4-ynoic Acid	Fatty Acyls	C10H12O3	+Na	0.0607297	Pos	1.2147	4.79713x10-29	1.07436x10-27	1.30246	6054.78	7886.12
203.06787	316	316-4	HMDB0037733	Propyl 2-furanacrylate	Fatty Acyls	C10H12O3	+Na	0.0607297	Pos	1.2147	4.79713x10-29	1.07436x10-27	1.30246	6054.78	7886.12
770.39924	2464	2464-2	HMDB0260719	PE(5-iso PGF2VI/14:1(9Z))	Unclassified	C37H66NO11P	+K	1.64486	Pos	1.20793	9.28303x10-19	9.88045x10-18	0.425796	3589.85	1528.54
770.39924	2464	2464-1	HMDB0260718	PE(14:1(9Z)/5-iso PGF2VI)	Unclassified	C37H66NO11P	+K	1.64486	Pos	1.20793	9.28303x10-19	9.88045x10-18	0.425796	3589.85	1528.54
365.15622	784	784-2	HMDB0255070	N-acetylmuramoyl-L-alanine	Organooxygen compounds	C14H24N2O9	+H	2.0477	Pos	1.20034	1.10805x10-31	2.97789x10-30	0.653529	4900.09	3202.35
365.15622	784	784-1	HMDB0060494	N-Acetylmuramoyl-Ala	Organooxygen compounds	C14H24N2O9	+H	2.0477	Pos	1.20034	1.10805x10-31	2.97789x10-30	0.653529	4900.09	3202.35
365.15622	784	784-3	HMDB0255071	n-acetylmuramyl-l-alanine	Carboxylic acids and derivatives	C14H24N2O9	+H	2.0477	Pos	1.20034	1.10805x10-31	2.97789x10-30	0.653529	4900.09	3202.35
150.97666	130	130-1	HMDB0304825	Sodium lactate	Carboxylic acids and derivatives	C3H5NaO3	+K	0.925971	Pos	1.19644	9.82882x10-18	9.51890x10-17	1.25416	8546.71	10718.9
241.12874	474	474-1	HMDB0259216	Triglycerol	Glycerolipids	C9H20O7	+H	2.07727	Pos	1.17929	5.68938x10-30	1.35913x10-28	1.37563	4393.06	6043.23
557.09424	924	924-1	HMDB0257286	Rocepafant	Thienodiazepines	C26H23ClN6OS2	+Na	2.40594	Pos	1.17277	4.87087x10-24	7.93362x10-23	1.25868	7357.81	9261.11
409.18217	816	816-1	HMDB0029772	Corchoionol C 9-glucoside	Fatty Acyls	C19H30O8	+Na	2.80475	Pos	1.16982	3.28731x10-34	9.29963x10-33	0.618608	4116.91	2546.76
409.18217	816	816-3	HMDB0035212	Sonchuionoside C	Prenol lipids	C19H30O8	+Na	2.80475	Pos	1.16982	3.28731x10-34	9.29963x10-33	0.618608	4116.91	2546.76
409.18217	816	816-2	HMDB0030370	Citroside A	Prenol lipids	C19H30O8	+Na	2.80475	Pos	1.16982	3.28731x10-34	9.29963x10-33	0.618608	4116.91	2546.76
161.12819	171	171-1	HMDB0004827	Proline betaine	Carboxylic acids and derivatives	C7H13NO2	+NH4	1.63546	Pos	1.168	1.15526x10-53	1.55238x10-51	2.6306	809.653	2129.87
291.06911	665	665-1	HMDB0041988	Pinazepam	Benzodiazepines	C18H13ClN2O	+H-H2O	1.17043	Pos	1.16723	3.91538x10-22	5.61204x10-21	1.38858	4567.13	6341.83
257.06020	534	534-1	HMDB0032660	(2Z,4'Z)-2-(5-Methylthio-4-penten-2-ynylidene)-1,6-dioxaspiro[4.4]non-3-ene	Organooxygen compounds	C13H14O2S	+Na	1.90498	Pos	1.16563	2.34025x10-20	2.89169x10-19	1.22033	8458.23	10321.8
231.09878	436	436-2	HMDB0030197	(Z)-3-Oxo-2-(2-pentenyl)-1-cyclopenteneacetic acid	Organooxygen compounds	C12H16O3	+Na	1.93424	Pos	1.16257	2.17583x10-21	2.92378x10-20	1.22059	8904.09	10868.2
231.09878	436	436-1	HMDB0030150	Jasmine ketolactone	Oxocins	C12H16O3	+Na	1.93424	Pos	1.16257	2.17583x10-21	2.92378x10-20	1.22059	8904.09	10868.2
231.09878	436	436-3	HMDB0030681	5-Deoxydiplosporin	Pyrans	C12H16O3	+Na	1.93424	Pos	1.16257	2.17583x10-21	2.92378x10-20	1.22059	8904.09	10868.2
225.05172	411	411-1	HMDB0247512	7-Methyl-6,8-bis(methylthio)pyrrolo(1,2-a)pyrazine	Pyrrolopyrazines	C10H12N2S2	+H	1.08979	Pos	1.16246	1.60378x10-21	2.18237x10-20	1.23696	7733.12	9565.56
781.40379	2507	2507-1	HMDB0060732	25-O-Desacetyl rifabutin	Naphthofurans	C41H56N4O11	+H	2.47168	Pos	1.1569	2.69871x10-17	2.47958x10-16	0.431106	3436.73	1481.6
156.04200	155	155-2	HMDB0029757	4-Hydroxybenzeneacetonitrile	Benzene and substituted derivatives	C8H7NO	+Na	0.0104503	Pos	1.14329	6.51221x10-08	2.11476x10-07	0.725199	10991.9	7971.28
156.04200	155	155-3	HMDB0032390	2-Methyl-4,5-benzoxazole	Benzoxazoles	C8H7NO	+Na	0.0104503	Pos	1.14329	6.51221x10-08	2.11476x10-07	0.725199	10991.9	7971.28
156.04200	155	155-1	HMDB0004094	Indoxyl	Indoles and derivatives	C8H7NO	+Na	0.0104503	Pos	1.14329	6.51221x10-08	2.11476x10-07	0.725199	10991.9	7971.28
167.05786	188	188-1	HMDB0033178	5-Methylquinoxaline	Diazanaphthalenes	C9H8N2	+Na	0.6588	Pos	1.14237	7.40026x10-28	1.52986x10-26	1.29005	5730.13	7392.14
167.05786	188	188-2	HMDB0034175	2-Aminoquinoline	Quinolines and derivatives	C9H8N2	+Na	0.6588	Pos	1.14237	7.40026x10-28	1.52986x10-26	1.29005	5730.13	7392.14
825.43017	2630	2630-1	HMDB0033404	Quillaic acid 3-[galactosyl-(1->2)-glucuronide]	Prenol lipids	C42H64O16	+H	4.11296	Pos	1.13796	5.49528x10-17	4.88217x10-16	0.491134	3730.07	1831.97
825.43017	2630	2630-2	HMDB0036943	Oleragenoside	Prenol lipids	C42H64O16	+H	4.11296	Pos	1.13796	5.49528x10-17	4.88217x10-16	0.491134	3730.07	1831.97
825.43017	2630	2630-3	HMDB0039448	Licoricesaponin J2	Prenol lipids	C42H64O16	+H	4.11296	Pos	1.13796	5.49528x10-17	4.88217x10-16	0.491134	3730.07	1831.97
825.43017	2630	2630-4	HMDB0039512	Periandrin III	Prenol lipids	C42H64O16	+H	4.11296	Pos	1.13796	5.49528x10-17	4.88217x10-16	0.491134	3730.07	1831.97
803.41702	2578	2578-1	HMDB0250399	Cogoxin	Steroids and steroid derivatives	C41H64O14	+Na	2.2465	Pos	1.13443	1.38670x10-17	1.28509x10-16	0.463032	3706.64	1716.29
803.41702	2578	2578-2	HMDB0252731	Gitoxin	Steroids and steroid derivatives	C41H64O14	+Na	2.2465	Pos	1.13443	1.38670x10-17	1.28509x10-16	0.463032	3706.64	1716.29
320.11505	736	736-1	HMDB0247396	1-(2-Methylbenzo[d]oxazol-6-yl)-3-(1,5-naphthyridin-4-yl)urea	Diazanaphthalenes	C17H13N5O2	+H	2.5627	Pos	1.13393	2.99616x10-23	4.53643x10-22	1.24383	7276.9	9051.26
667.93650	1922	1922-1	HMDB0059647	Adenosine 5'-pentaphosphate	Purine nucleotides	C10H18N5O19P5	+H	1.13597	Pos	1.12974	3.49955x10-17	3.16135x10-16	0.476335	3667.03	1746.74
836.43625	2656	2656-1	HMDB0254710	midecamycin	Organooxygen compounds	C41H67NO15	+Na	4.83253	Pos	1.12812	1.53332x10-16	1.29789x10-15	0.453152	3597.55	1630.24
836.43625	2656	2656-2	HMDB0255523	Neoisomidecamycin	Organooxygen compounds	C41H67NO15	+Na	4.83253	Pos	1.12812	1.53332x10-16	1.29789x10-15	0.453152	3597.55	1630.24
847.69322	2674	2674-1	HMDB0007960	PC(39:1)	Glycerophospholipids	C47H92NO8P	+NH4	3.94079	Pos	1.12251	8.98731x10-21	1.15016x10-19	0.36792	2815.47	1035.87
847.69322	2674	2674-2	HMDB0009014	PE(42:1)	Glycerophospholipids	C47H92NO8P	+NH4	3.94079	Pos	1.12251	8.98731x10-21	1.15016x10-19	0.36792	2815.47	1035.87
239.06752	464	464-1	HMDB0013989	O-Desmethylnaproxen	Naphthalenes	C13H12O3	+Na	1.4955	Pos	1.1214	1.47566x10-25	2.73507x10-24	1.29584	5546.48	7187.33
239.06752	464	464-2	HMDB0030647	Artemidinol	Isocoumarins and derivatives	C13H12O3	+Na	1.4955	Pos	1.1214	1.47566x10-25	2.73507x10-24	1.29584	5546.48	7187.33
239.06752	464	464-3	HMDB0032035	6-(3,4-Methylenedioxyphenyl)-3,5-hexadien-2-one	Benzodioxoles	C13H12O3	+Na	1.4955	Pos	1.1214	1.47566x10-25	2.73507x10-24	1.29584	5546.48	7187.33
239.06752	464	464-5	HMDB0037723	2-Phenylethyl 2-furancarboxylate	Furans	C13H12O3	+Na	1.4955	Pos	1.1214	1.47566x10-25	2.73507x10-24	1.29584	5546.48	7187.33
239.06752	464	464-6	HMDB0038017	Ethyl 2-phenyl-3-furancarboxylate	Furans	C13H12O3	+Na	1.4955	Pos	1.1214	1.47566x10-25	2.73507x10-24	1.29584	5546.48	7187.33
239.06752	464	464-4	HMDB0032656	(Z)-6-(2-Methoxyvinyl)-7-methyl-2H-1-benzopyran-2-one	Coumarins and derivatives	C13H12O3	+Na	1.4955	Pos	1.1214	1.47566x10-25	2.73507x10-24	1.29584	5546.48	7187.33
114.06634	49	49-3	HMDB0246813	5-Hydroxypyrimidine	Diazines	C4H4N2O	+NH4	1.16501	Pos	1.11981	2.79610x10-16	2.33008x10-15	1.2321	8734.96	10762.4
114.06634	49	49-2	HMDB0246116	3(2H)-Pyridazinone	Diazines	C4H4N2O	+NH4	1.16501	Pos	1.11981	2.79610x10-16	2.33008x10-15	1.2321	8734.96	10762.4
114.06634	49	49-4	HMDB0256975	pyrimidin-2-ol	Diazines	C4H4N2O	+NH4	1.16501	Pos	1.11981	2.79610x10-16	2.33008x10-15	1.2321	8734.96	10762.4
114.06634	49	49-1	HMDB0245166	2-Hydroxypyrazine	Diazines	C4H4N2O	+NH4	1.16501	Pos	1.11981	2.79610x10-16	2.33008x10-15	1.2321	8734.96	10762.4
114.06634	49	49-5	HMDB0256976	pyrimidin-4-ol	Diazines	C4H4N2O	+NH4	1.16501	Pos	1.11981	2.79610x10-16	2.33008x10-15	1.2321	8734.96	10762.4
858.44943	2692	2692-1	HMDB0281766	PS(18:3(6Z,9Z,12Z)/PGJ2)	Unclassified	C44H70NO12P	+Na	3.90689	Pos	1.11255	1.60722x10-16	1.34982x10-15	0.45666	3431.18	1566.88
858.44943	2692	2692-2	HMDB0281767	PS(PGJ2/18:3(6Z,9Z,12Z))	Unclassified	C44H70NO12P	+Na	3.90689	Pos	1.11255	1.60722x10-16	1.34982x10-15	0.45666	3431.18	1566.88
858.44943	2692	2692-3	HMDB0281870	PS(18:3(9Z,12Z,15Z)/PGJ2)	Unclassified	C44H70NO12P	+Na	3.90689	Pos	1.11255	1.60722x10-16	1.34982x10-15	0.45666	3431.18	1566.88
858.44943	2692	2692-4	HMDB0281871	PS(PGJ2/18:3(9Z,12Z,15Z))	Unclassified	C44H70NO12P	+Na	3.90689	Pos	1.11255	1.60722x10-16	1.34982x10-15	0.45666	3431.18	1566.88
858.44943	2692	2692-5	HMDB0281977	PS(18:4(6Z,9Z,12Z,15Z)/20:4(6Z,8E,10E,14Z)-2OH(5S,12R))	Unclassified	C44H70NO12P	+Na	3.90689	Pos	1.11255	1.60722x10-16	1.34982x10-15	0.45666	3431.18	1566.88
858.44943	2692	2692-6	HMDB0281978	PS(20:4(6Z,8E,10E,14Z)-2OH(5S,12R)/18:4(6Z,9Z,12Z,15Z))	Unclassified	C44H70NO12P	+Na	3.90689	Pos	1.11255	1.60722x10-16	1.34982x10-15	0.45666	3431.18	1566.88
858.44943	2692	2692-7	HMDB0282013	PS(18:4(6Z,9Z,12Z,15Z)/20:4(6E,8Z,11Z,13E)-2OH(5S,15S))	Unclassified	C44H70NO12P	+Na	3.90689	Pos	1.11255	1.60722x10-16	1.34982x10-15	0.45666	3431.18	1566.88
858.44943	2692	2692-8	HMDB0282014	PS(20:4(6E,8Z,11Z,13E)-2OH(5S,15S)/18:4(6Z,9Z,12Z,15Z))	Unclassified	C44H70NO12P	+Na	3.90689	Pos	1.11255	1.60722x10-16	1.34982x10-15	0.45666	3431.18	1566.88
858.44943	2692	2692-9	HMDB0282015	PS(18:4(6Z,9Z,12Z,15Z)/20:4(8Z,11Z,14Z,17Z)-2OH(5S,6R))	Unclassified	C44H70NO12P	+Na	3.90689	Pos	1.11255	1.60722x10-16	1.34982x10-15	0.45666	3431.18	1566.88
858.44943	2692	2692-10	HMDB0282016	PS(20:4(8Z,11Z,14Z,17Z)-2OH(5S,6R)/18:4(6Z,9Z,12Z,15Z))	Unclassified	C44H70NO12P	+Na	3.90689	Pos	1.11255	1.60722x10-16	1.34982x10-15	0.45666	3431.18	1566.88
185.03226	253	253-3	HMDB0003423	D-Glutamine	Carboxylic acids and derivatives	C5H10N2O3	+K	0.341453	Pos	1.10728	1.26843x10-15	9.67065x10-15	1.15933	12669.1	14687.7
185.03226	253	253-1	HMDB0000641	L-Glutamine	Carboxylic acids and derivatives	C5H10N2O3	+K	0.341453	Pos	1.10728	1.26843x10-15	9.67065x10-15	1.15933	12669.1	14687.7
185.03226	253	253-2	HMDB0002031	Ureidoisobutyric acid	Organic carbonic acids and derivatives	C5H10N2O3	+K	0.341453	Pos	1.10728	1.26843x10-15	9.67065x10-15	1.15933	12669.1	14687.7
185.03226	253	253-4	HMDB0006899	Alanylglycine	Carboxylic acids and derivatives	C5H10N2O3	+K	0.341453	Pos	1.10728	1.26843x10-15	9.67065x10-15	1.15933	12669.1	14687.7
541.26086	888	888-1	HMDB0031935	Blumenol C O-[rhamnosyl-(1->6)-glucoside]	Fatty Acyls	C25H42O11	+Na	2.04918	Pos	1.09457	3.00522x10-35	9.78973x10-34	0.413185	2262.72	934.922
229.11977	430	430-2	HMDB0032176	Benzyl hexanoate	Benzene and substituted derivatives	C13H18O2	+Na	0.575937	Pos	1.09413	1.29496x10-30	3.16383x10-29	1.38596	3580.78	4962.82
229.11977	430	430-5	HMDB0035017	2-Phenylethyl 3-methylbutanoate	Fatty Acyls	C13H18O2	+Na	0.575937	Pos	1.09413	1.29496x10-30	3.16383x10-29	1.38596	3580.78	4962.82
229.11977	430	430-6	HMDB0036240	Methyl 4-tert-butylphenylacetate	Benzene and substituted derivatives	C13H18O2	+Na	0.575937	Pos	1.09413	1.29496x10-30	3.16383x10-29	1.38596	3580.78	4962.82
229.11977	430	430-3	HMDB0034469	2-Phenylpropyl butyrate	Fatty Acyls	C13H18O2	+Na	0.575937	Pos	1.09413	1.29496x10-30	3.16383x10-29	1.38596	3580.78	4962.82
229.11977	430	430-9	HMDB0037604	10beta-12,13-Dinor-8-oxo-6-eremophilen-11-al	Organooxygen compounds	C13H18O2	+Na	0.575937	Pos	1.09413	1.29496x10-30	3.16383x10-29	1.38596	3580.78	4962.82
229.11977	430	430-10	HMDB0037720	2-Phenylethyl 2-methylbutanoate	Fatty Acyls	C13H18O2	+Na	0.575937	Pos	1.09413	1.29496x10-30	3.16383x10-29	1.38596	3580.78	4962.82
229.11977	430	430-11	HMDB0040431	Hexyl benzoate	Benzene and substituted derivatives	C13H18O2	+Na	0.575937	Pos	1.09413	1.29496x10-30	3.16383x10-29	1.38596	3580.78	4962.82
229.11977	430	430-4	HMDB0035016	2-Phenylethyl pentanoate	Fatty Acyls	C13H18O2	+Na	0.575937	Pos	1.09413	1.29496x10-30	3.16383x10-29	1.38596	3580.78	4962.82
229.11977	430	430-8	HMDB0037194	Ethyl-2-ethyl-3-phenylpropanoate	Fatty Acyls	C13H18O2	+Na	0.575937	Pos	1.09413	1.29496x10-30	3.16383x10-29	1.38596	3580.78	4962.82
229.11977	430	430-1	HMDB0029669	Eremopetasinorone A	Organooxygen compounds	C13H18O2	+Na	0.575937	Pos	1.09413	1.29496x10-30	3.16383x10-29	1.38596	3580.78	4962.82
229.11977	430	430-7	HMDB0036391	alpha-Methylphenethyl butyrate	Benzene and substituted derivatives	C13H18O2	+Na	0.575937	Pos	1.09413	1.29496x10-30	3.16383x10-29	1.38596	3580.78	4962.82
669.36151	1935	1935-2	HMDB0037827	Monoglucuronylglycyrrhetinic acid	Prenol lipids	C36H54O10	+Na	0.884351	Pos	1.09268	5.45533x10-17	4.88217x10-16	0.389655	3078.39	1199.51
669.36151	1935	1935-1	HMDB0034520	Gypsogenin 3-O-b-D-glucuronide	Prenol lipids	C36H54O10	+Na	0.884351	Pos	1.09268	5.45533x10-17	4.88217x10-16	0.389655	3078.39	1199.51
249.12482	504	504-1	HMDB0249257	Bis(ethylphenyl)ether	Benzene and substituted derivatives	C16H18O	+Na	0.639106	Pos	1.07113	1.93188x10-33	5.32505x10-32	1.70639	1815.5	3097.95
137.04573	93	93-1	HMDB0000157	Hypoxanthine	Imidazopyrimidines	C5H4N4O	+H	0.445894	Pos	1.06843	2.08373x10-37	8.29632x10-36	1.55674	2194.16	3415.72
148.00342	125	125-1	HMDB0000251	Taurine	Organic sulfonic acids and derivatives	C2H7NO3S	+Na	3.14863	Pos	1.06395	1.38639x10-19	1.58550x10-18	0.727842	6219.36	4526.71
497.23490	865	865-1	HMDB0249158	Betamethasone 17-benzoate	Steroids and steroid derivatives	C29H33FO6	+H	2.87074	Pos	1.06075	1.67736x10-31	4.39796x10-30	0.488928	2635.16	1288.4
147.11263	122	122-3	HMDB0005960	D-Pipecolic acid	Carboxylic acids and derivatives	C6H11NO2	+NH4	1.34899	Pos	1.05786	1.82481x10-12	1.06036x10-11	0.824505	12901.7	10637.5
147.11263	122	122-4	HMDB0029444	2-Pyrrolidineacetic acid	Pyrrolidines	C6H11NO2	+NH4	1.34899	Pos	1.05786	1.82481x10-12	1.06036x10-11	0.824505	12901.7	10637.5
147.11263	122	122-2	HMDB0000716	L-Pipecolic acid	Carboxylic acids and derivatives	C6H11NO2	+NH4	1.34899	Pos	1.05786	1.82481x10-12	1.06036x10-11	0.824505	12901.7	10637.5
147.11263	122	122-1	HMDB0000070	Pipecolic acid	Carboxylic acids and derivatives	C6H11NO2	+NH4	1.34899	Pos	1.05786	1.82481x10-12	1.06036x10-11	0.824505	12901.7	10637.5
325.17702	748	748-1	HMDB0000380	2-Hydroxyestradiol-3-methyl ether	Carboxylic acids and derivatives	C19H26O3	+Na	1.34948	Pos	1.05768	6.79708x10-21	8.91081x10-20	1.23614	6545.42	8091.07
325.17702	748	748-4	HMDB0003959	19-Oxotestosterone	Steroids and steroid derivatives	C19H26O3	+Na	1.34948	Pos	1.05768	6.79708x10-21	8.91081x10-20	1.23614	6545.42	8091.07
325.17702	748	748-5	HMDB0006771	7a-Hydroxyandrost-4-ene-3,17-dione	Steroids and steroid derivatives	C19H26O3	+Na	1.34948	Pos	1.05768	6.79708x10-21	8.91081x10-20	1.23614	6545.42	8091.07
325.17702	748	748-8	HMDB0012782	4-Methoxy-17beta-estradiol	Steroids and steroid derivatives	C19H26O3	+Na	1.34948	Pos	1.05768	6.79708x10-21	8.91081x10-20	1.23614	6545.42	8091.07
325.17702	748	748-9	HMDB0031038	(2Z,8S,9Z)-2,9-Heptadecadiene-8-hydroxy-4,6-diyne-1-yl acetate	Fatty Acyls	C19H26O3	+Na	1.34948	Pos	1.05768	6.79708x10-21	8.91081x10-20	1.23614	6545.42	8091.07
325.17702	748	748-10	HMDB0033125	[8]-Dehydroshogaol	Cinnamic acids and derivatives	C19H26O3	+Na	1.34948	Pos	1.05768	6.79708x10-21	8.91081x10-20	1.23614	6545.42	8091.07
325.17702	748	748-3	HMDB0003955	19-Hydroxyandrost-4-ene-3,17-dione	Steroids and steroid derivatives	C19H26O3	+Na	1.34948	Pos	1.05768	6.79708x10-21	8.91081x10-20	1.23614	6545.42	8091.07
325.17702	748	748-12	HMDB0034167	Falcarindiol 3-acetate	Fatty Acyls	C19H26O3	+Na	1.34948	Pos	1.05768	6.79708x10-21	8.91081x10-20	1.23614	6545.42	8091.07
325.17702	748	748-13	HMDB0036696	Yucalexin B'11	Organooxygen compounds	C19H26O3	+Na	1.34948	Pos	1.05768	6.79708x10-21	8.91081x10-20	1.23614	6545.42	8091.07
325.17702	748	748-14	HMDB0039568	Ginsenoyne H	Carboxylic acids and derivatives	C19H26O3	+Na	1.34948	Pos	1.05768	6.79708x10-21	8.91081x10-20	1.23614	6545.42	8091.07
325.17702	748	748-15	HMDB0040927	2-Hexyl-5-[2-(4-hydroxy-3-methoxyphenyl)ethyl]furan	Fatty Acyls	C19H26O3	+Na	1.34948	Pos	1.05768	6.79708x10-21	8.91081x10-20	1.23614	6545.42	8091.07
325.17702	748	748-16	HMDB0041204	Acetylpanaxydol	Carboxylic acids and derivatives	C19H26O3	+Na	1.34948	Pos	1.05768	6.79708x10-21	8.91081x10-20	1.23614	6545.42	8091.07
325.17702	748	748-17	HMDB0242733	4-Androsten-4-ol-3,17-dione	Steroids and steroid derivatives	C19H26O3	+Na	1.34948	Pos	1.05768	6.79708x10-21	8.91081x10-20	1.23614	6545.42	8091.07
325.17702	748	748-18	HMDB0243551	Bioallethrin	Fatty Acyls	C19H26O3	+Na	1.34948	Pos	1.05768	6.79708x10-21	8.91081x10-20	1.23614	6545.42	8091.07
325.17702	748	748-19	HMDB0244360	(8R,9R,10S,11S,13R,14R)-11-Hydroxy-10,13-dimethyl-2,6,7,8,9,11,12,14,15,16-decahydro-1H-cyclopenta[a]phenanthrene-3,17-dione	Steroids and steroid derivatives	C19H26O3	+Na	1.34948	Pos	1.05768	6.79708x10-21	8.91081x10-20	1.23614	6545.42	8091.07
325.17702	748	748-20	HMDB0244364	11-Ketotestosterone	Steroids and steroid derivatives	C19H26O3	+Na	1.34948	Pos	1.05768	6.79708x10-21	8.91081x10-20	1.23614	6545.42	8091.07
325.17702	748	748-21	HMDB0245198	2-Methoxy-17alpha-estradiol	Steroids and steroid derivatives	C19H26O3	+Na	1.34948	Pos	1.05768	6.79708x10-21	8.91081x10-20	1.23614	6545.42	8091.07
325.17702	748	748-22	HMDB0246470	(8R,9S,10R,13S,14S)-4-Hydroxy-10,13-dimethyl-1,6,7,8,9,10,11,12,13,14,15,16-dodecahydro-2H-cyclopenta[a]phenanthrene-3,17-dione	Steroids and steroid derivatives	C19H26O3	+Na	1.34948	Pos	1.05768	6.79708x10-21	8.91081x10-20	1.23614	6545.42	8091.07
325.17702	748	748-23	HMDB0246490	4-Methoxy-17alpha-estradiol	Steroids and steroid derivatives	C19H26O3	+Na	1.34948	Pos	1.05768	6.79708x10-21	8.91081x10-20	1.23614	6545.42	8091.07
325.17702	748	748-24	HMDB0247266	7-Keto-dehydroepiandrosterone	Steroids and steroid derivatives	C19H26O3	+Na	1.34948	Pos	1.05768	6.79708x10-21	8.91081x10-20	1.23614	6545.42	8091.07
325.17702	748	748-25	HMDB0251855	EPIMESTROL	Steroids and steroid derivatives	C19H26O3	+Na	1.34948	Pos	1.05768	6.79708x10-21	8.91081x10-20	1.23614	6545.42	8091.07
325.17702	748	748-26	HMDB0257882	(8R,9S,13S,14S,17S)-13-Methyl-3-methylperoxy-6,7,8,9,11,12,14,15,16,17-decahydrocyclopenta[a]phenanthren-17-ol	Steroids and steroid derivatives	C19H26O3	+Na	1.34948	Pos	1.05768	6.79708x10-21	8.91081x10-20	1.23614	6545.42	8091.07
325.17702	748	748-27	HMDB0258073	(8S,9R,10R,13S,14S)-11-Hydroxy-10,13-dimethyl-5,6,7,8,9,11,12,14,15,16-decahydro-4H-cyclopenta[a]phenanthrene-3,17-dione	Steroids and steroid derivatives	C19H26O3	+Na	1.34948	Pos	1.05768	6.79708x10-21	8.91081x10-20	1.23614	6545.42	8091.07
325.17702	748	748-28	HMDB0258855	Testololactone	Naphthopyrans	C19H26O3	+Na	1.34948	Pos	1.05768	6.79708x10-21	8.91081x10-20	1.23614	6545.42	8091.07
325.17702	748	748-29	HMDB0260174	(8R,9S,10R,13S,14S,17S)-17-Hydroxy-10,13-dimethyl-6,7,8,9,11,12,14,15,16,17-decahydro-1H-cyclopenta[a]phenanthrene-2,3-dione	Steroids and steroid derivatives	C19H26O3	+Na	1.34948	Pos	1.05768	6.79708x10-21	8.91081x10-20	1.23614	6545.42	8091.07
325.17702	748	748-7	HMDB0006774	16a-Hydroxyandrost-4-ene-3,17-dione	Steroids and steroid derivatives	C19H26O3	+Na	1.34948	Pos	1.05768	6.79708x10-21	8.91081x10-20	1.23614	6545.42	8091.07
325.17702	748	748-6	HMDB0006773	11b-Hydroxyandrost-4-ene-3,17-dione	Oxazinanes	C19H26O3	+Na	1.34948	Pos	1.05768	6.79708x10-21	8.91081x10-20	1.23614	6545.42	8091.07
325.17702	748	748-11	HMDB0034028	2-(3,7-Dimethyl-2,6-octadienyl)-4-hydroxy-6-methoxyacetophenone	Organooxygen compounds	C19H26O3	+Na	1.34948	Pos	1.05768	6.79708x10-21	8.91081x10-20	1.23614	6545.42	8091.07
325.17702	748	748-2	HMDB0000405	2-Methoxyestradiol	Steroids and steroid derivatives	C19H26O3	+Na	1.34948	Pos	1.05768	6.79708x10-21	8.91081x10-20	1.23614	6545.42	8091.07
207.99796	337	337-2	HMDB0001721	DL-O-Phosphoserine	Carboxylic acids and derivatives	C3H8NO6P	+Na	0.873873	Pos	1.04736	1.18886x10-26	2.36672x10-25	1.46175	2980.94	4357.39
207.99796	337	337-1	HMDB0000272	Phosphoserine	Carboxylic acids and derivatives	C3H8NO6P	+Na	0.873873	Pos	1.04736	1.18886x10-26	2.36672x10-25	1.46175	2980.94	4357.39
647.33186	1751	1751-1	HMDB0266663	PA(8:0/22:6(5Z,7Z,10Z,13Z,16Z,19Z)-OH(4))	Unclassified	C33H53O9P	+Na	0.114813	Pos	1.03852	7.04441x10-12	3.74888x10-11	0.616542	5059.07	3119.13
647.33186	1751	1751-3	HMDB0266665	PA(8:0/22:6(4Z,8Z,10Z,13Z,16Z,19Z)-OH(7))	Unclassified	C33H53O9P	+Na	0.114813	Pos	1.03852	7.04441x10-12	3.74888x10-11	0.616542	5059.07	3119.13
647.33186	1751	1751-5	HMDB0266667	PA(8:0/22:6(4Z,7Z,10Z,12E,16Z,19Z)-OH(14))	Unclassified	C33H53O9P	+Na	0.114813	Pos	1.03852	7.04441x10-12	3.74888x10-11	0.616542	5059.07	3119.13
647.33186	1751	1751-2	HMDB0266664	PA(22:6(5Z,7Z,10Z,13Z,16Z,19Z)-OH(4)/8:0)	Unclassified	C33H53O9P	+Na	0.114813	Pos	1.03852	7.04441x10-12	3.74888x10-11	0.616542	5059.07	3119.13
647.33186	1751	1751-7	HMDB0266669	PA(8:0/22:6(4Z,7Z,10Z,13E,15E,19Z)-OH(17))	Unclassified	C33H53O9P	+Na	0.114813	Pos	1.03852	7.04441x10-12	3.74888x10-11	0.616542	5059.07	3119.13
647.33186	1751	1751-4	HMDB0266666	PA(22:6(4Z,8Z,10Z,13Z,16Z,19Z)-OH(7)/8:0)	Unclassified	C33H53O9P	+Na	0.114813	Pos	1.03852	7.04441x10-12	3.74888x10-11	0.616542	5059.07	3119.13
647.33186	1751	1751-9	HMDB0266673	PA(8:0/22:5(4Z,7Z,10Z,13Z,19Z)-O(16,17))	Unclassified	C33H53O9P	+Na	0.114813	Pos	1.03852	7.04441x10-12	3.74888x10-11	0.616542	5059.07	3119.13
647.33186	1751	1751-10	HMDB0266674	PA(22:5(4Z,7Z,10Z,13Z,19Z)-O(16,17)/8:0)	Unclassified	C33H53O9P	+Na	0.114813	Pos	1.03852	7.04441x10-12	3.74888x10-11	0.616542	5059.07	3119.13
647.33186	1751	1751-6	HMDB0266668	PA(22:6(4Z,7Z,10Z,12E,16Z,19Z)-OH(14)/8:0)	Unclassified	C33H53O9P	+Na	0.114813	Pos	1.03852	7.04441x10-12	3.74888x10-11	0.616542	5059.07	3119.13
647.33186	1751	1751-8	HMDB0266670	PA(22:6(4Z,7Z,10Z,13E,15E,19Z)-OH(17)/8:0)	Unclassified	C33H53O9P	+Na	0.114813	Pos	1.03852	7.04441x10-12	3.74888x10-11	0.616542	5059.07	3119.13
880.46223	2719	2719-1	HMDB0033805	Azaspiracid	Azaspirodecane derivatives	C47H71NO12	+K	1.53289	Pos	1.01062	1.10624x10-14	7.98128x10-14	0.409116	2731.08	1117.33
m/z, mass-to-charge ratio; VIP, variable importance in projection; FC, fold change; Neg, negative; Pos, positive; SCI, spinal cord injury; PPM, parts per million.

## Sheet: SCI-white_Sham-white
Table SI. Differentially expressed metabolites in gray and white matter.
m/z	ID	ID-number	Compound ID	Metabolites	Class	Formula	Adduct	PPM	Ion mode	VIP	P-value	Adjusted P-value	FC	Average (Sham-white_matter)	Average (SCI-white_matter)
174.04088	67	67-1	HMDB0247079	6-Hydroxymethylpterin	Pteridines and derivatives	C7H7N5O2	-H2O-H	1.09655	Neg	7.24226	3.70638x10-35	9.88368x10-34	2.02631	31951.5	64743.6
96.96965	9	9-1	HMDB0303539	Potassium acetate	Carboxylic acids and derivatives	C2H3KO2	-H	0.850142	Neg	4.33626	8.89562x10-52	1.42330x10-49	1.6206	16190.8	26238.8
146.04580	47	47-1	HMDB0000897	7-Methylguanine	Imidazopyrimidines	C6H7N5O	-H2O-H	2.48372	Neg	3.61794	4.66533x10-32	9.33066x10-31	2.10124	7707.94	16196.2
146.04580	47	47-2	HMDB0006040	N2-Methylguanine	Imidazopyrimidines	C6H7N5O	-H2O-H	2.48372	Neg	3.61794	4.66533x10-32	9.33066x10-31	2.10124	7707.94	16196.2
117.01946	18	18-1	HMDB0000157	Hypoxanthine	Imidazopyrimidines	C5H4N4O	-H2O-H	1.04021	Neg	3.13625	3.05287x10-23	2.57084x10-22	1.69428	10413.6	17643.5
132.03014	30	30-3	HMDB0000542	8-Hydroxyadenine	Imidazopyrimidines	C5H5N5O	-H2O-H	2.75481	Neg	2.90949	2.13631x10-29	3.10735x10-28	2.67458	3450.3	9228.1
132.03014	30	30-1	HMDB0000132	Guanine	Imidazopyrimidines	C5H5N5O	-H2O-H	2.75481	Neg	2.90949	2.13631x10-29	3.10735x10-28	2.67458	3450.3	9228.1
132.03014	30	30-2	HMDB0000403	2-Hydroxyadenine	Imidazopyrimidines	C5H5N5O	-H2O-H	2.75481	Neg	2.90949	2.13631x10-29	3.10735x10-28	2.67458	3450.3	9228.1
133.01412	32	32-2	HMDB0039789	Tetrahydro-2-methyl-2-thiophenethiol	Thiolanes	C5H10S2	-H	0.5664	Neg	2.80441	7.10098x10-23	5.41027x10-22	2.20172	4809.95	10590.2
133.01412	32	32-1	HMDB0038974	3,3-Dimethyl-1,2-dithiolane	Dithiolanes	C5H10S2	-H	0.5664	Neg	2.80441	7.10098x10-23	5.41027x10-22	2.20172	4809.95	10590.2
133.01412	32	32-3	HMDB0039790	Tetrahydro-2-methyl-3-thiophenethiol	Thiolanes	C5H10S2	-H	0.5664	Neg	2.80441	7.10098x10-23	5.41027x10-22	2.20172	4809.95	10590.2
255.23343	125	125-1	HMDB0031082	1-Pentadecene	Unsaturated hydrocarbons	C15H30	+FA-H	1.87763	Neg	2.13367	1.23839x10-33	2.83061x10-32	1.37867	7507.66	10350.6
255.23343	125	125-2	HMDB0031083	(E)-7-Pentadecene	Unsaturated hydrocarbons	C15H30	+FA-H	1.87763	Neg	2.13367	1.23839x10-33	2.83061x10-32	1.37867	7507.66	10350.6
175.02493	68	68-2	HMDB0258965	theophylline one	Imidazopyrimidines	C7H6N4O3	-H2O-H	0.844934	Neg	1.89166	1.27781x10-31	2.08171x10-30	2.30736	1780.38	4107.99
175.02493	68	68-1	HMDB0033245	6-(Hydroxymethyl)-2,4(1H,3H)-pteridinedione	Pteridines and derivatives	C7H6N4O3	-H2O-H	0.844934	Neg	1.89166	1.27781x10-31	2.08171x10-30	2.30736	1780.38	4107.99
179.05629	73	73-1	HMDB0004400	5-Acetylamino-6-amino-3-methyluracil	Organonitrogen compounds	C7H10N4O3	-H2O-H	0.588097	Neg	1.75963	6.81163x10-24	6.05478x10-23	1.72004	3031.68	5214.62
303.08405	147	147-1	HMDB0252307	Flobufen	Organooxygen compounds	C17H14F2O3	-H	4.19357	Neg	1.6845	5.59255x10-37	1.78961x10-35	1.90821	1877.96	3583.54
145.06186	46	46-2	HMDB0033952	Gyromitrin	Organonitrogen compounds	C4H8N2O	+FA-H	0.0425209	Neg	1.50895	3.30747x10-37	1.32299x10-35	1.64202	2137.54	3509.89
145.06186	46	46-1	HMDB0031642	N-Nitroso-pyrrolidine	Pyrrolidines	C4H8N2O	+FA-H	0.0425209	Neg	1.50895	3.30747x10-37	1.32299x10-35	1.64202	2137.54	3509.89
885.54946	244	244-1	HMDB0009793	PI(38:4)	Glycerophospholipids	C47H83O13P	-H	0.703671	Neg	1.2142	8.94303x10-39	4.76962x10-37	1.84735	1008.52	1863.09
130.06239	29	29-2	HMDB0013222	Beta-Guanidinopropionic acid	Organonitrogen compounds	C4H9N3O2	-H	1.48196	Neg	1.17316	4.39146x10-42	3.51317x10-40	1.87597	928.904	1742.59
130.06239	29	29-1	HMDB0000064	Creatine	Carboxylic acids and derivatives	C4H9N3O2	-H	1.48196	Neg	1.17316	4.39146x10-42	3.51317x10-40	1.87597	928.904	1742.59
215.03274	98	98-2	HMDB0001889	Theophylline	Imidazopyrimidines	C7H8N4O2	+Cl	1.55056	Neg	1.09769	4.51908x10-13	1.53841x10-12	1.55028	2076.82	3219.66
215.03274	98	98-3	HMDB0002825	Theobromine	Imidazopyrimidines	C7H8N4O2	+Cl	1.55056	Neg	1.09769	4.51908x10-13	1.53841x10-12	1.55028	2076.82	3219.66
215.03274	98	98-1	HMDB0001860	Paraxanthine	Imidazopyrimidines	C7H8N4O2	+Cl	1.55056	Neg	1.09769	4.51908x10-13	1.53841x10-12	1.55028	2076.82	3219.66
125.00117	24	24-2	HMDB0000700	Hydroxypropionic acid	Hydroxy acids and derivatives	C3H6O3	+Cl	0.582743	Neg	1.09377	1.88937x10-25	2.01533x10-24	2.03877	806.135	1643.52
125.00117	24	24-3	HMDB0001051	Glyceraldehyde	Organooxygen compounds	C3H6O3	+Cl	0.582743	Neg	1.09377	1.88937x10-25	2.01533x10-24	2.03877	806.135	1643.52
125.00117	24	24-4	HMDB0001311	D-Lactic acid	Hydroxy acids and derivatives	C3H6O3	+Cl	0.582743	Neg	1.09377	1.88937x10-25	2.01533x10-24	2.03877	806.135	1643.52
125.00117	24	24-1	HMDB0000190	L-Lactic acid	Hydroxy acids and derivatives	C3H6O3	+Cl	0.582743	Neg	1.09377	1.88937x10-25	2.01533x10-24	2.03877	806.135	1643.52
125.00117	24	24-5	HMDB0001882	Dihydroxyacetone	Organooxygen compounds	C3H6O3	+Cl	0.582743	Neg	1.09377	1.88937x10-25	2.01533x10-24	2.03877	806.135	1643.52
269.08844	130	130-1	HMDB0028755	Aspartyl-Histidine	Carboxylic acids and derivatives	C10H14N4O5	-H	1.38559	Neg	1.0415	4.46384x10-19	2.74698x10-18	1.74368	1222.35	2131.38
269.08844	130	130-2	HMDB0028881	Histidylaspartic acid	Carboxylic acids and derivatives	C10H14N4O5	-H	1.38559	Neg	1.0415	4.46384x10-19	2.74698x10-18	1.74368	1222.35	2131.38
171.00631	64	64-1	HMDB0012228	Ethylphosphate	Organic phosphoric acids and derivatives	C2H7O4P	+FA-H	0.5196	Neg	1.013	1.30107x10-31	2.08171x10-30	2.66669	416.184	1109.83
317.11371	728	728-3	HMDB0041141	Marshdine	Quinolines and derivatives	C16H13NO5	+NH4	1.43951	Pos	17.7185	1.25632x10-53	2.25091x10-51	1.28023	738408	945335
317.11371	728	728-4	HMDB0041516	Avenanthramide G	Cinnamic acids and derivatives	C16H13NO5	+NH4	1.43951	Pos	17.7185	1.25632x10-53	2.25091x10-51	1.28023	738408	945335
317.11371	728	728-1	HMDB0029284	Avenanthramide 1c	Cinnamic acids and derivatives	C16H13NO5	+NH4	1.43951	Pos	17.7185	1.25632x10-53	2.25091x10-51	1.28023	738408	945335
317.11371	728	728-2	HMDB0038577	(Z)-N-Coumaroyl-5-hydroxyanthranilic acid	Cinnamic acids and derivatives	C16H13NO5	+NH4	1.43951	Pos	17.7185	1.25632x10-53	2.25091x10-51	1.28023	738408	945335
255.06258	525	525-3	HMDB0038911	(2S,3S,4S)-5,7,9,11-Tridecatetrayne-1,2,3,4-tetrol	Fatty Acyls	C13H12O4	+Na	0.930018	Pos	7.4434	1.89546x10-49	1.56740x10-47	1.26917	140466	178274
255.06258	525	525-2	HMDB0033330	Dihydrocoriandrin	Benzopyrans	C13H12O4	+Na	0.930018	Pos	7.4434	1.89546x10-49	1.56740x10-47	1.26917	140466	178274
255.06258	525	525-4	HMDB0041325	Salfredin B11	Benzopyrans	C13H12O4	+Na	0.930018	Pos	7.4434	1.89546x10-49	1.56740x10-47	1.26917	140466	178274
255.06258	525	525-1	HMDB0030813	Cassiachromone	Benzopyrans	C13H12O4	+Na	0.930018	Pos	7.4434	1.89546x10-49	1.56740x10-47	1.26917	140466	178274
255.06258	525	525-5	HMDB0255452	Naphthoxylactic acid	Naphthalenes	C13H12O4	+Na	0.930018	Pos	7.4434	1.89546x10-49	1.56740x10-47	1.26917	140466	178274
318.11732	730	730-2	HMDB0255293	N2-Ethyl-2'-deoxyguanosine	Purine nucleosides	C12H17N5O4	+Na	0.0224615	Pos	7.32291	7.69141x10-52	1.18118x10-49	1.27928	127950	163684
318.11732	730	730-1	HMDB0255287	N(6),O(2)-Dimethyladenosine	Purine nucleosides	C12H17N5O4	+Na	0.0224615	Pos	7.32291	7.69141x10-52	1.18118x10-49	1.27928	127950	163684
207.07794	333	333-1	HMDB0249075	Benzyl phenyl ether	Phenol ethers	C13H12O	+Na	0.67194	Pos	7.09988	5.62645x10-102	6.04843x10-99	1.54742	49112.4	75997.8
104.10711	28	28-1	HMDB0244984	2-Amino-3-methyl-1-butanol	Organonitrogen compounds	C5H13NO	+H	1.08344	Pos	5.83117	1.09157x10-11	5.53508x10-11	1.14954	292546	336293
145.02576	114	114-1	HMDB0303720	Sodium benzoate	Benzene and substituted derivatives	C7H5NaO2	+H	1.69278	Pos	4.6446	8.75784x10-51	1.04608x10-48	1.27831	52073.4	66566
319.11239	733	733-2	HMDB0245678	4-Nitrophenyl beta-D-glucopyranoside	Organooxygen compounds	C12H15NO8	+NH4	3.90983	Pos	4.53426	7.02965x10-48	5.03791x10-46	1.28851	49199.7	63394.1
319.11239	733	733-1	HMDB0244855	2-Nitrophenyl a-D-galactopyranoside	Organooxygen compounds	C12H15NO8	+NH4	3.90983	Pos	4.53426	7.02965x10-48	5.03791x10-46	1.28851	49199.7	63394.1
146.16487	118	118-1	HMDB0001257	Spermidine	Organonitrogen compounds	C7H19N3	+H	2.31385	Pos	4.50593	1.42012x10-24	2.12031x10-23	1.23247	80066.9	98680.1
189.05176	265	265-1	HMDB0244601	2-(Sec-butyldisulfanyl)-1h-imidazole	Azoles	C7H12N2S2	+H	1.48533	Pos	3.99912	3.34895x10-39	1.63642x10-37	1.29726	40447.4	52470.7
127.02671	71	71-2	HMDB0252088	Ethylurea	Organic carbonic acids and derivatives	C3H8N2O	+K	0.840775	Pos	3.92605	1.00035x10-51	1.34422x10-49	1.29754	34662.1	44975.5
127.02671	71	71-3	HMDB0253863	L-alaninamide	Carboxylic acids and derivatives	C3H8N2O	+K	0.840775	Pos	3.92605	1.00035x10-51	1.34422x10-49	1.29754	34662.1	44975.5
127.02671	71	71-1	HMDB0244027	1,1-Dimethylurea	Organic carbonic acids and derivatives	C3H8N2O	+K	0.840775	Pos	3.92605	1.00035x10-51	1.34422x10-49	1.29754	34662.1	44975.5
213.05178	361	361-1	HMDB0032991	7-Methoxy-6-methyl-2H-1-benzopyran-2-one	Coumarins and derivatives	C11H10O3	+Na	2.31491	Pos	3.81018	3.02901x10-41	1.91541x10-39	1.27438	38763.3	49399.2
213.05178	361	361-5	HMDB0040938	Coixinden A	Indenes and isoindenes	C11H10O3	+Na	2.31491	Pos	3.81018	3.02901x10-41	1.91541x10-39	1.27438	38763.3	49399.2
213.05178	361	361-4	HMDB0040731	Avenalumic acid	Benzene and substituted derivatives	C11H10O3	+Na	2.31491	Pos	3.81018	3.02901x10-41	1.91541x10-39	1.27438	38763.3	49399.2
213.05178	361	361-2	HMDB0039359	Methyl (Z,Z)-10-hydroxy-2,8-decadiene-4,6-diynoate	Fatty Acyls	C11H10O3	+Na	2.31491	Pos	3.81018	3.02901x10-41	1.91541x10-39	1.27438	38763.3	49399.2
213.05178	361	361-7	HMDB0247248	7-Ethoxycoumarin	Coumarins and derivatives	C11H10O3	+Na	2.31491	Pos	3.81018	3.02901x10-41	1.91541x10-39	1.27438	38763.3	49399.2
213.05178	361	361-3	HMDB0040326	7-Hydroxy-2,5-dimethyl-4H-1-benzopyran-4-one	Benzopyrans	C11H10O3	+Na	2.31491	Pos	3.81018	3.02901x10-41	1.91541x10-39	1.27438	38763.3	49399.2
213.05178	361	361-6	HMDB0041122	(S)-2,3-Dihydro-5-hydroxy-2-methyl-1,4-naphthoquinone	Naphthalenes	C11H10O3	+Na	2.31491	Pos	3.81018	3.02901x10-41	1.91541x10-39	1.27438	38763.3	49399.2
132.07641	81	81-2	HMDB0003646	N-Methylhydantoin	Azolines	C4H6N2O2	+NH4	2.73067	Pos	3.74367	6.27320x10-12	3.33846x10-11	1.17392	107925	126696
132.07641	81	81-1	HMDB0000076	Dihydrouracil	Diazines	C4H6N2O2	+NH4	2.73067	Pos	3.74367	6.27320x10-12	3.33846x10-11	1.17392	107925	126696
201.08853	310	310-4	HMDB0038179	3-(2-Hydroxy-4-methylphenyl)-2-butanone	Prenol lipids	C11H14O2	+Na	0.513168	Pos	3.71364	2.44162x10-18	2.40802x10-17	1.14895	99232.8	114014
201.08853	310	310-3	HMDB0036385	Methyl 4-phenylbutanoate	Fatty Acyls	C11H14O2	+Na	0.513168	Pos	3.71364	2.44162x10-18	2.40802x10-17	1.14895	99232.8	114014
201.08853	310	310-2	HMDB0035013	2-Phenylethyl propanoate	Benzene and substituted derivatives	C11H14O2	+Na	0.513168	Pos	3.71364	2.44162x10-18	2.40802x10-17	1.14895	99232.8	114014
201.08853	310	310-5	HMDB0040411	Ethyl 3-phenylpropanoate	Fatty Acyls	C11H14O2	+Na	0.513168	Pos	3.71364	2.44162x10-18	2.40802x10-17	1.14895	99232.8	114014
201.08853	310	310-1	HMDB0031864	Methyleugenol	Benzene and substituted derivatives	C11H14O2	+Na	0.513168	Pos	3.71364	2.44162x10-18	2.40802x10-17	1.14895	99232.8	114014
595.26554	1210	1210-1	HMDB0250581	Cucurbitacin E	Steroids and steroid derivatives	C32H44O8	+K	2.20498	Pos	2.68524	5.69272x10-38	2.66073x10-36	1.35129	15621.1	21108.6
170.03260	199	199-1	HMDB0000064	Creatine	Carboxylic acids and derivatives	C4H9N3O2	+K	0.207655	Pos	2.49665	2.23935x10-08	7.31703x10-08	1.19259	55846.3	66601.6
170.03260	199	199-2	HMDB0013222	Beta-Guanidinopropionic acid	Organonitrogen compounds	C4H9N3O2	+K	0.207655	Pos	2.49665	2.23935x10-08	7.31703x10-08	1.19259	55846.3	66601.6
160.90116	169	169-1	HMDB0303534	Potassium carbonate (K2CO3)	Organic carbonic acids and derivatives	CK2O3	+Na	1.51735	Pos	2.42735	5.88676x10-58	1.58207x10-55	1.76211	4940.39	8705.5
233.07845	440	440-1	HMDB0013070	Sinapyl alcohol	Phenols	C11H14O4	+Na	0.129898	Pos	2.33248	4.38352x10-31	9.81725x10-30	1.23991	18725.2	23217.6
193.06222	280	280-3	HMDB0034446	Diphenyl ether	Benzene and substituted derivatives	C12H10O	+Na	1.07173	Pos	2.30779	8.91798x10-58	1.91737x10-55	1.51626	6619.67	10037.2
193.06222	280	280-1	HMDB0032412	Methyl beta-naphthyl ketone	Naphthalenes	C12H10O	+Na	1.07173	Pos	2.30779	8.91798x10-58	1.91737x10-55	1.51626	6619.67	10037.2
193.06222	280	280-2	HMDB0032582	2-Biphenylol	Benzene and substituted derivatives	C12H10O	+Na	1.07173	Pos	2.30779	8.91798x10-58	1.91737x10-55	1.51626	6619.67	10037.2
223.07257	400	400-2	HMDB0030646	(Z)-3-(1-Butenyl)-1H-2-benzopyran-1-one	Isocoumarins and derivatives	C13H12O2	+Na	1.94732	Pos	2.27001	1.53929x10-50	1.65474x10-48	1.36729	9476.7	12957.4
223.07257	400	400-1	HMDB0014738	Monobenzone	Phenols	C13H12O2	+Na	1.94732	Pos	2.27001	1.53929x10-50	1.65474x10-48	1.36729	9476.7	12957.4
223.07257	400	400-6	HMDB0245357	2,2'-Methylenediphenol	Benzene and substituted derivatives	C13H12O2	+Na	1.94732	Pos	2.27001	1.53929x10-50	1.65474x10-48	1.36729	9476.7	12957.4
223.07257	400	400-9	HMDB0250959	Dehydrotremetone	Benzofurans	C13H12O2	+Na	1.94732	Pos	2.27001	1.53929x10-50	1.65474x10-48	1.36729	9476.7	12957.4
223.07257	400	400-3	HMDB0036460	Safynol	Fatty Acyls	C13H12O2	+Na	1.94732	Pos	2.27001	1.53929x10-50	1.65474x10-48	1.36729	9476.7	12957.4
223.07257	400	400-4	HMDB0240711	Bisphenol F	Benzene and substituted derivatives	C13H12O2	+Na	1.94732	Pos	2.27001	1.53929x10-50	1.65474x10-48	1.36729	9476.7	12957.4
223.07257	400	400-8	HMDB0245967	(3-Phenoxyphenyl)methanol	Benzene and substituted derivatives	C13H12O2	+Na	1.94732	Pos	2.27001	1.53929x10-50	1.65474x10-48	1.36729	9476.7	12957.4
223.07257	400	400-5	HMDB0244965	2-[Hydroxy(phenyl)methyl]phenol	Benzene and substituted derivatives	C13H12O2	+Na	1.94732	Pos	2.27001	1.53929x10-50	1.65474x10-48	1.36729	9476.7	12957.4
223.07257	400	400-7	HMDB0245676	1-(4-Methoxy-1-naphthyl)ethanone	Naphthalenes	C13H12O2	+Na	1.94732	Pos	2.27001	1.53929x10-50	1.65474x10-48	1.36729	9476.7	12957.4
223.07257	400	400-11	HMDB0303824	(7E)-4-Deoxy-2,3-dihydromycosinol	Organooxygen compounds	C13H12O2	+Na	1.94732	Pos	2.27001	1.53929x10-50	1.65474x10-48	1.36729	9476.7	12957.4
223.07257	400	400-10	HMDB0302506	4-Deoxy-2,3-dihydromycosinol	Organooxygen compounds	C13H12O2	+Na	1.94732	Pos	2.27001	1.53929x10-50	1.65474x10-48	1.36729	9476.7	12957.4
208.08133	338	338-1	HMDB0240294	2-O-Methylascorbic acid	Dihydrofurans	C7H10O6	+NH4	1.12815	Pos	2.17644	2.60277x10-64	1.39899x10-61	1.55181	5243.75	8137.3
147.11263	122	122-4	HMDB0029444	2-Pyrrolidineacetic acid	Pyrrolidines	C6H11NO2	+NH4	1.34899	Pos	2.16517	6.40261x10-24	8.82411x10-23	0.759627	20130.7	15291.8
147.11263	122	122-3	HMDB0005960	D-Pipecolic acid	Carboxylic acids and derivatives	C6H11NO2	+NH4	1.34899	Pos	2.16517	6.40261x10-24	8.82411x10-23	0.759627	20130.7	15291.8
147.11263	122	122-2	HMDB0000716	L-Pipecolic acid	Carboxylic acids and derivatives	C6H11NO2	+NH4	1.34899	Pos	2.16517	6.40261x10-24	8.82411x10-23	0.759627	20130.7	15291.8
147.11263	122	122-1	HMDB0000070	Pipecolic acid	Carboxylic acids and derivatives	C6H11NO2	+NH4	1.34899	Pos	2.16517	6.40261x10-24	8.82411x10-23	0.759627	20130.7	15291.8
217.04689	375	375-1	HMDB0000954	Ferulic acid	Cinnamic acids and derivatives	C10H10O4	+Na	1.0955	Pos	2.14051	8.18497x10-40	4.18992x10-38	1.24846	12934.9	16148.8
199.03630	302	302-1	HMDB0029758	Herniarin	Coumarins and derivatives	C10H8O3	+Na	1.5699	Pos	2.071	4.07573x10-33	1.15300x10-31	1.27236	12742.7	16213.4
199.03630	302	302-5	HMDB0033813	3-(3,4-Methylenedioxyphenyl)propenal	Benzodioxoles	C10H8O3	+Na	1.5699	Pos	2.071	4.07573x10-33	1.15300x10-31	1.27236	12742.7	16213.4
199.03630	302	302-2	HMDB0031054	10-Hydroxy-2,8-decadiene-4,6-diynoic acid	Fatty Acyls	C10H8O3	+Na	1.5699	Pos	2.071	4.07573x10-33	1.15300x10-31	1.27236	12742.7	16213.4
199.03630	302	302-8	HMDB0303033	8-Methoxycoumarin	Coumarins and derivatives	C10H8O3	+Na	1.5699	Pos	2.071	4.07573x10-33	1.15300x10-31	1.27236	12742.7	16213.4
199.03630	302	302-7	HMDB0251931	Erythrocentaurin	Benzopyrans	C10H8O3	+Na	1.5699	Pos	2.071	4.07573x10-33	1.15300x10-31	1.27236	12742.7	16213.4
199.03630	302	302-3	HMDB0032883	1,4,5-Naphthalenetriol	Naphthalenes	C10H8O3	+Na	1.5699	Pos	2.071	4.07573x10-33	1.15300x10-31	1.27236	12742.7	16213.4
199.03630	302	302-6	HMDB0059622	4-Methylumbelliferone	Coumarins and derivatives	C10H8O3	+Na	1.5699	Pos	2.071	4.07573x10-33	1.15300x10-31	1.27236	12742.7	16213.4
199.03630	302	302-4	HMDB0032990	7-Hydroxy-6-methyl-2H-1-benzopyran-2-one	Coumarins and derivatives	C10H8O3	+Na	1.5699	Pos	2.071	4.07573x10-33	1.15300x10-31	1.27236	12742.7	16213.4
231.09878	436	436-3	HMDB0030681	5-Deoxydiplosporin	Pyrans	C12H16O3	+Na	1.93424	Pos	2.04598	2.16680x10-36	8.62708x10-35	1.32773	9780.51	12985.9
231.09878	436	436-2	HMDB0030197	(Z)-3-Oxo-2-(2-pentenyl)-1-cyclopenteneacetic acid	Organooxygen compounds	C12H16O3	+Na	1.93424	Pos	2.04598	2.16680x10-36	8.62708x10-35	1.32773	9780.51	12985.9
231.09878	436	436-1	HMDB0030150	Jasmine ketolactone	Oxocins	C12H16O3	+Na	1.93424	Pos	2.04598	2.16680x10-36	8.62708x10-35	1.32773	9780.51	12985.9
319.12087	734	734-1	HMDB0245477	2,4,5-Triphenylimidazole	Azoles	C21H16N2	+Na	0.700009	Pos	2.0033	1.31566x10-37	5.82995x10-36	1.32121	9272.47	12250.9
209.05683	343	343-1	HMDB0032708	1-Naphthaleneacetic acid	Naphthalenes	C12H10O2	+Na	2.38894	Pos	1.95875	1.35580x10-37	5.82995x10-36	1.29609	9939.92	12883
209.05683	343	343-2	HMDB0243757	[1,1'-Biphenyl]-2,3'-diol	Benzene and substituted derivatives	C12H10O2	+Na	2.38894	Pos	1.95875	1.35580x10-37	5.82995x10-36	1.29609	9939.92	12883
209.05683	343	343-5	HMDB0246489	4-Methoxy-1-naphthaldehyde	Naphthalenes	C12H10O2	+Na	2.38894	Pos	1.95875	1.35580x10-37	5.82995x10-36	1.29609	9939.92	12883
209.05683	343	343-8	HMDB0301834	Eutypine	Organooxygen compounds	C12H10O2	+Na	2.38894	Pos	1.95875	1.35580x10-37	5.82995x10-36	1.29609	9939.92	12883
209.05683	343	343-6	HMDB0246987	2-Naphthylacetic acid	Naphthalenes	C12H10O2	+Na	2.38894	Pos	1.95875	1.35580x10-37	5.82995x10-36	1.29609	9939.92	12883
209.05683	343	343-4	HMDB0245250	2-Naphthyl acetate	Naphthalenes	C12H10O2	+Na	2.38894	Pos	1.95875	1.35580x10-37	5.82995x10-36	1.29609	9939.92	12883
209.05683	343	343-7	HMDB0247086	6-Methoxy-2-naphthaldehyde	Naphthalenes	C12H10O2	+Na	2.38894	Pos	1.95875	1.35580x10-37	5.82995x10-36	1.29609	9939.92	12883
209.05683	343	343-3	HMDB0243958	1-Naphthyl acetate	Naphthalenes	C12H10O2	+Na	2.38894	Pos	1.95875	1.35580x10-37	5.82995x10-36	1.29609	9939.92	12883
156.04200	155	155-3	HMDB0032390	2-Methyl-4,5-benzoxazole	Benzoxazoles	C8H7NO	+Na	0.0104503	Pos	1.91429	7.37100x10-32	1.80087x10-30	0.552552	6820.8	3768.85
156.04200	155	155-1	HMDB0004094	Indoxyl	Indoles and derivatives	C8H7NO	+Na	0.0104503	Pos	1.91429	7.37100x10-32	1.80087x10-30	0.552552	6820.8	3768.85
156.04200	155	155-2	HMDB0029757	4-Hydroxybenzeneacetonitrile	Benzene and substituted derivatives	C8H7NO	+Na	0.0104503	Pos	1.91429	7.37100x10-32	1.80087x10-30	0.552552	6820.8	3768.85
760.58291	2417	2417-1	HMDB0007879	PC(34:1)	Glycerophospholipids	C42H82NO8P	+H	2.85447	Pos	1.91285	2.51592x10-24	3.60616x10-23	1.33649	9866.7	13186.7
760.58291	2417	2417-2	HMDB0008908	PE(37:1)	Glycerophospholipids	C42H82NO8P	+H	2.85447	Pos	1.91285	2.51592x10-24	3.60616x10-23	1.33649	9866.7	13186.7
233.02025	439	439-1	HMDB0256496	Phosphovanillin	Organic phosphoric acids and derivatives	C8H9O6P	+H	3.21657	Pos	1.84105	7.90842x10-30	1.60407x10-28	1.25474	11011.6	13816.8
786.59807	2523	2523-1	HMDB0115591	PA(41:3)	Glycerophospholipids	C44H81O8P	+NH4	3.39811	Pos	1.82486	7.19260x10-50	6.44337x10-48	2.22264	1860.32	4134.83
148.00342	125	125-1	HMDB0000251	Taurine	Organic sulfonic acids and derivatives	C2H7NO3S	+Na	3.14863	Pos	1.80886	7.38437x10-49	5.67014x10-47	0.595328	5762.97	3430.86
150.97666	130	130-1	HMDB0304825	Sodium lactate	Carboxylic acids and derivatives	C3H5NaO3	+K	0.925971	Pos	1.78735	1.26315x10-35	4.68237x10-34	1.28263	8671.04	11121.8
173.05698	212	212-2	HMDB0002222	3-Methylphenylacetic acid	Benzene and substituted derivatives	C9H10O2	+Na	2.12835	Pos	1.78586	3.00479x10-33	8.97263x10-32	1.26307	9490.3	11986.9
173.05698	212	212-1	HMDB0000764	Hydrocinnamic acid	Phenylpropanoic acids	C9H10O2	+Na	2.12835	Pos	1.78586	3.00479x10-33	8.97263x10-32	1.26307	9490.3	11986.9
173.05698	212	212-3	HMDB0002237	3,4-Dimethylbenzoic acid	Benzene and substituted derivatives	C9H10O2	+Na	2.12835	Pos	1.78586	3.00479x10-33	8.97263x10-32	1.26307	9490.3	11986.9
173.05698	212	212-4	HMDB0011743	2-Phenylpropionate	Phenylpropanoic acids	C9H10O2	+Na	2.12835	Pos	1.78586	3.00479x10-33	8.97263x10-32	1.26307	9490.3	11986.9
104.07068	26	26-8	HMDB0003911	3-Aminoisobutanoic acid	Carboxylic acids and derivatives	C4H9NO2	+H	0.579005	Pos	1.78244	1.10920x10-12	6.39401x10-12	1.32596	13411.1	17782.6
104.07068	26	26-10	HMDB0031654	3-Aminobutanoic acid	Carboxylic acids and derivatives	C4H9NO2	+H	0.579005	Pos	1.78244	1.10920x10-12	6.39401x10-12	1.32596	13411.1	17782.6
104.07068	26	26-2	HMDB0000112	gamma-Aminobutyric acid	Carboxylic acids and derivatives	C4H9NO2	+H	0.579005	Pos	1.78244	1.10920x10-12	6.39401x10-12	1.32596	13411.1	17782.6
104.07068	26	26-3	HMDB0000452	L-alpha-Aminobutyric acid	Carboxylic acids and derivatives	C4H9NO2	+H	0.579005	Pos	1.78244	1.10920x10-12	6.39401x10-12	1.32596	13411.1	17782.6
104.07068	26	26-7	HMDB0002299	(R)-beta-Aminoisobutyric acid	Carboxylic acids and derivatives	C4H9NO2	+H	0.579005	Pos	1.78244	1.10920x10-12	6.39401x10-12	1.32596	13411.1	17782.6
104.07068	26	26-1	HMDB0000092	Dimethylglycine	Carboxylic acids and derivatives	C4H9NO2	+H	0.579005	Pos	1.78244	1.10920x10-12	6.39401x10-12	1.32596	13411.1	17782.6
104.07068	26	26-4	HMDB0000650	D-alpha-Aminobutyric acid	Carboxylic acids and derivatives	C4H9NO2	+H	0.579005	Pos	1.78244	1.10920x10-12	6.39401x10-12	1.32596	13411.1	17782.6
104.07068	26	26-5	HMDB0001906	2-Aminoisobutyric acid	Carboxylic acids and derivatives	C4H9NO2	+H	0.579005	Pos	1.78244	1.10920x10-12	6.39401x10-12	1.32596	13411.1	17782.6
104.07068	26	26-11	HMDB0041945	N-Ethylglycine	Carboxylic acids and derivatives	C4H9NO2	+H	0.579005	Pos	1.78244	1.10920x10-12	6.39401x10-12	1.32596	13411.1	17782.6
104.07068	26	26-6	HMDB0002166	(S)-beta-Aminoisobutyric acid	Carboxylic acids and derivatives	C4H9NO2	+H	0.579005	Pos	1.78244	1.10920x10-12	6.39401x10-12	1.32596	13411.1	17782.6
104.07068	26	26-9	HMDB0031329	Butyl nitrite	Organonitrogen compounds	C4H9NO2	+H	0.579005	Pos	1.78244	1.10920x10-12	6.39401x10-12	1.32596	13411.1	17782.6
808.58040	2586	2586-1	HMDB0000593	PC(36:2)	Glycerophospholipids	C44H84NO8P	+Na	2.81158	Pos	1.77111	3.80126x10-50	3.71487x10-48	2.34797	1590.86	3735.28
788.61379	2534	2534-1	HMDB0008915	PE(39:1)	Glycerophospholipids	C44H86NO8P	+H	3.29136	Pos	1.74743	4.86910x10-36	1.86939x10-34	1.50461	4638.23	6978.73
225.08804	413	413-3	HMDB0259119	Tremetone	Benzene and substituted derivatives	C13H14O2	+Na	2.67043	Pos	1.74016	1.77140x10-28	3.40045x10-27	1.25008	10599	13249.6
225.08804	413	413-1	HMDB0030816	6-Acetyl-2,2-dimethyl-2H-1-benzopyran	Benzopyrans	C13H14O2	+Na	2.67043	Pos	1.74016	1.77140x10-28	3.40045x10-27	1.25008	10599	13249.6
225.08804	413	413-2	HMDB0031663	3-(3-Methylbutylidene)-1(3H)-isobenzofuranone	Isocoumarans	C13H14O2	+Na	2.67043	Pos	1.74016	1.77140x10-28	3.40045x10-27	1.25008	10599	13249.6
320.11505	736	736-1	HMDB0247396	1-(2-Methylbenzo[d]oxazol-6-yl)-3-(1,5-naphthyridin-4-yl)urea	Diazanaphthalenes	C17H13N5O2	+H	2.5627	Pos	1.73503	3.42869x10-34	1.11692x10-32	1.28902	8289.71	10685.6
229.08320	429	429-1	HMDB0015023	Pemirolast	Pyridopyrimidines	C10H8N6O	+H	0.208242	Pos	1.71092	1.36226x10-33	4.18408x10-32	1.31547	7423.31	9765.16
177.08838	228	228-1	HMDB0244259	1,N6-Ethenoadenine	Imidazopyrimidines	C7H5N5	+NH4	0.248177	Pos	1.67952	1.11152x10-40	6.63823x10-39	1.50335	4064.76	6110.74
253.11914	519	519-1	HMDB0013940	3'-Hydroxyhexobarbital	Diazines	C12H16N2O4	+H	3.21068	Pos	1.67729	2.99277x10-25	4.66264x10-24	1.22631	11295.1	13851.3
253.11914	519	519-4	HMDB0029004	Phenylalanylserine	Carboxylic acids and derivatives	C12H16N2O4	+H	3.21068	Pos	1.67729	2.99277x10-25	4.66264x10-24	1.22631	11295.1	13851.3
253.11914	519	519-5	HMDB0029046	Serylphenylalanine	Carboxylic acids and derivatives	C12H16N2O4	+H	3.21068	Pos	1.67729	2.99277x10-25	4.66264x10-24	1.22631	11295.1	13851.3
253.11914	519	519-3	HMDB0028699	Alanyltyrosine	Carboxylic acids and derivatives	C12H16N2O4	+H	3.21068	Pos	1.67729	2.99277x10-25	4.66264x10-24	1.22631	11295.1	13851.3
253.11914	519	519-6	HMDB0029098	Tyrosyl-Alanine	Carboxylic acids and derivatives	C12H16N2O4	+H	3.21068	Pos	1.67729	2.99277x10-25	4.66264x10-24	1.22631	11295.1	13851.3
253.11914	519	519-2	HMDB0013941	Epoxy-hexobarbital	Diazines	C12H16N2O4	+H	3.21068	Pos	1.67729	2.99277x10-25	4.66264x10-24	1.22631	11295.1	13851.3
210.08879	348	348-1	HMDB0040012	2,3-Dihydro-5-(5-methyl-2-furanyl)-1H-pyrrolizine	Pyrrolizines	C12H13NO	+Na	0.792727	Pos	1.67403	3.55157x10-23	4.71350x10-22	1.26294	10071.1	12719.2
203.06787	316	316-1	HMDB0031240	2-Phenyl-1,3-dioxolane-4-methanol	Benzene and substituted derivatives	C10H12O3	+Na	0.0607297	Pos	1.65873	5.08626x10-35	1.76378x10-33	1.32225	6685.8	8840.31
203.06787	316	316-4	HMDB0037733	Propyl 2-furanacrylate	Fatty Acyls	C10H12O3	+Na	0.0607297	Pos	1.65873	5.08626x10-35	1.76378x10-33	1.32225	6685.8	8840.31
203.06787	316	316-2	HMDB0032174	Benzaldehyde glyceryl acetal	Dioxanes	C10H12O3	+Na	0.0607297	Pos	1.65873	5.08626x10-35	1.76378x10-33	1.32225	6685.8	8840.31
203.06787	316	316-5	HMDB0062773	10-hydroxy-(2E,8E)-decadien-4-ynoic Acid	Fatty Acyls	C10H12O3	+Na	0.0607297	Pos	1.65873	5.08626x10-35	1.76378x10-33	1.32225	6685.8	8840.31
203.06787	316	316-3	HMDB0032574	Propylparaben	Benzene and substituted derivatives	C10H12O3	+Na	0.0607297	Pos	1.65873	5.08626x10-35	1.76378x10-33	1.32225	6685.8	8840.31
161.12819	171	171-1	HMDB0004827	Proline betaine	Carboxylic acids and derivatives	C7H13NO2	+NH4	1.63546	Pos	1.63593	3.66192x10-61	1.31219x10-58	2.48158	1135.18	2817.04
257.06020	534	534-1	HMDB0032660	(2Z,4'Z)-2-(5-Methylthio-4-penten-2-ynylidene)-1,6-dioxaspiro[4.4]non-3-ene	Organooxygen compounds	C13H14O2S	+Na	1.90498	Pos	1.63036	3.80666x10-26	6.39401x10-25	1.24634	9593.87	11957.3
429.23959	833	833-1	HMDB0015163	Irbesartan	Benzene and substituted derivatives	C25H28N6O	+H	0.423518	Pos	1.62335	4.01444x10-09	1.45610x10-08	1.16348	25083.1	29183.7
167.05786	188	188-1	HMDB0033178	5-Methylquinoxaline	Diazanaphthalenes	C9H8N2	+Na	0.6588	Pos	1.61344	6.65368x10-37	2.75104x10-35	1.32133	6364.92	8410.14
167.05786	188	188-2	HMDB0034175	2-Aminoquinoline	Quinolines and derivatives	C9H8N2	+Na	0.6588	Pos	1.61344	6.65368x10-37	2.75104x10-35	1.32133	6364.92	8410.14
154.05819	149	149-2	HMDB0013222	Beta-Guanidinopropionic acid	Organonitrogen compounds	C4H9N3O2	+Na	3.30462	Pos	1.61107	3.05091x10-05	6.50741x10-05	1.0948	57448.7	62894.8
154.05819	149	149-1	HMDB0000064	Creatine	Carboxylic acids and derivatives	C4H9N3O2	+Na	3.30462	Pos	1.61107	3.05091x10-05	6.50741x10-05	1.0948	57448.7	62894.8
181.06213	241	241-2	HMDB0060303	(2-Naphthyl)methanol	Naphthalenes	C11H10O	+Na	1.38607	Pos	1.58066	1.43916x10-41	9.66935x10-40	1.38533	4812.29	6666.61
181.06213	241	241-3	HMDB0060322	1-Hydroxymethylnaphthalene	Naphthalenes	C11H10O	+Na	1.38607	Pos	1.58066	1.43916x10-41	9.66935x10-40	1.38533	4812.29	6666.61
181.06213	241	241-1	HMDB0032861	2-Methoxynaphthalene	Naphthalenes	C11H10O	+Na	1.38607	Pos	1.58066	1.43916x10-41	9.66935x10-40	1.38533	4812.29	6666.61
257.04176	533	533-2	HMDB0040408	7-Hydroxy-2-methyl-4-oxo-4H-1-benzopyran-5-acetic acid	Benzopyrans	C12H10O5	+Na	1.20333	Pos	1.56875	9.41543x10-17	8.36494x10-16	1.20748	12757.5	15404.5
257.04176	533	533-3	HMDB0248606	Armillarisin A	Coumarins and derivatives	C12H10O5	+Na	1.20333	Pos	1.56875	9.41543x10-17	8.36494x10-16	1.20748	12757.5	15404.5
257.04176	533	533-1	HMDB0034345	7-Acetoxy-6-methoxycoumarin	Coumarins and derivatives	C12H10O5	+Na	1.20333	Pos	1.56875	9.41543x10-17	8.36494x10-16	1.20748	12757.5	15404.5
137.07056	96	96-1	HMDB0003152	N-Methylnicotinamide	Pyridines and derivatives	C7H8N2O	+H	2.88408	Pos	1.5628	4.12904x10-40	2.21936x10-38	1.45156	3953.37	5738.56
225.05172	411	411-1	HMDB0247512	7-Methyl-6,8-bis(methylthio)pyrrolo(1,2-a)pyrazine	Pyrrolopyrazines	C10H12N2S2	+H	1.08979	Pos	1.54475	4.70994x10-27	8.58167x10-26	1.24496	8580.48	10682.3
162.11244	172	172-1	HMDB0244982	beta-Hydroxy-gamma-trimethylaminobutyric acid	Carboxylic acids and derivatives	C7H15NO3	+H	0.200889	Pos	1.53738	3.33409x10-16	2.75704x10-15	0.789389	13378.5	10560.8
162.11244	172	172-2	HMDB0254990	N-(2-Hydroxyethyl)valine	Carboxylic acids and derivatives	C7H15NO3	+H	0.200889	Pos	1.53738	3.33409x10-16	2.75704x10-15	0.789389	13378.5	10560.8
140.06798	108	108-1	HMDB0253424	Imidazotetrazine	Tetrazines	C3H2N6	+NH4	0.168206	Pos	1.52375	1.11934x10-31	2.61585x10-30	0.623694	5235.57	3265.4
255.09863	526	526-1	HMDB0029504	Marindinin	Kavalactones	C14H16O3	+Na	2.30465	Pos	1.52117	2.41195x10-32	6.32401x10-31	1.3644	5010.06	6835.71
255.09863	526	526-2	HMDB0036189	Tetrahydrofurfuryl cinnamate	Cinnamic acids and derivatives	C14H16O3	+Na	2.30465	Pos	1.52117	2.41195x10-32	6.32401x10-31	1.3644	5010.06	6835.71
255.09863	526	526-3	HMDB0036605	Pterosin E	Indanes	C14H16O3	+Na	2.30465	Pos	1.52117	2.41195x10-32	6.32401x10-31	1.3644	5010.06	6835.71
824.55391	2627	2627-1	HMDB0000593	PC(36:2)	Glycerophospholipids	C44H84NO8P	+K	3.30847	Pos	1.52006	3.53142x10-35	1.26543x10-33	2.22975	1538.61	3430.72
239.06752	464	464-1	HMDB0013989	O-Desmethylnaproxen	Naphthalenes	C13H12O3	+Na	1.4955	Pos	1.48988	9.66529x10-31	2.12045x10-29	1.30311	6179.51	8052.59
239.06752	464	464-4	HMDB0032656	(Z)-6-(2-Methoxyvinyl)-7-methyl-2H-1-benzopyran-2-one	Coumarins and derivatives	C13H12O3	+Na	1.4955	Pos	1.48988	9.66529x10-31	2.12045x10-29	1.30311	6179.51	8052.59
239.06752	464	464-2	HMDB0030647	Artemidinol	Isocoumarins and derivatives	C13H12O3	+Na	1.4955	Pos	1.48988	9.66529x10-31	2.12045x10-29	1.30311	6179.51	8052.59
239.06752	464	464-3	HMDB0032035	6-(3,4-Methylenedioxyphenyl)-3,5-hexadien-2-one	Benzodioxoles	C13H12O3	+Na	1.4955	Pos	1.48988	9.66529x10-31	2.12045x10-29	1.30311	6179.51	8052.59
239.06752	464	464-5	HMDB0037723	2-Phenylethyl 2-furancarboxylate	Furans	C13H12O3	+Na	1.4955	Pos	1.48988	9.66529x10-31	2.12045x10-29	1.30311	6179.51	8052.59
239.06752	464	464-6	HMDB0038017	Ethyl 2-phenyl-3-furancarboxylate	Furans	C13H12O3	+Na	1.4955	Pos	1.48988	9.66529x10-31	2.12045x10-29	1.30311	6179.51	8052.59
229.11977	430	430-3	HMDB0034469	2-Phenylpropyl butyrate	Fatty Acyls	C13H18O2	+Na	0.575937	Pos	1.48659	2.55395x10-40	1.44500x10-38	1.41551	3956.47	5600.42
229.11977	430	430-2	HMDB0032176	Benzyl hexanoate	Benzene and substituted derivatives	C13H18O2	+Na	0.575937	Pos	1.48659	2.55395x10-40	1.44500x10-38	1.41551	3956.47	5600.42
229.11977	430	430-7	HMDB0036391	alpha-Methylphenethyl butyrate	Benzene and substituted derivatives	C13H18O2	+Na	0.575937	Pos	1.48659	2.55395x10-40	1.44500x10-38	1.41551	3956.47	5600.42
229.11977	430	430-10	HMDB0037720	2-Phenylethyl 2-methylbutanoate	Fatty Acyls	C13H18O2	+Na	0.575937	Pos	1.48659	2.55395x10-40	1.44500x10-38	1.41551	3956.47	5600.42
229.11977	430	430-6	HMDB0036240	Methyl 4-tert-butylphenylacetate	Benzene and substituted derivatives	C13H18O2	+Na	0.575937	Pos	1.48659	2.55395x10-40	1.44500x10-38	1.41551	3956.47	5600.42
229.11977	430	430-1	HMDB0029669	Eremopetasinorone A	Organooxygen compounds	C13H18O2	+Na	0.575937	Pos	1.48659	2.55395x10-40	1.44500x10-38	1.41551	3956.47	5600.42
229.11977	430	430-11	HMDB0040431	Hexyl benzoate	Benzene and substituted derivatives	C13H18O2	+Na	0.575937	Pos	1.48659	2.55395x10-40	1.44500x10-38	1.41551	3956.47	5600.42
229.11977	430	430-4	HMDB0035016	2-Phenylethyl pentanoate	Fatty Acyls	C13H18O2	+Na	0.575937	Pos	1.48659	2.55395x10-40	1.44500x10-38	1.41551	3956.47	5600.42
229.11977	430	430-8	HMDB0037194	Ethyl-2-ethyl-3-phenylpropanoate	Fatty Acyls	C13H18O2	+Na	0.575937	Pos	1.48659	2.55395x10-40	1.44500x10-38	1.41551	3956.47	5600.42
229.11977	430	430-9	HMDB0037604	10beta-12,13-Dinor-8-oxo-6-eremophilen-11-al	Organooxygen compounds	C13H18O2	+Na	0.575937	Pos	1.48659	2.55395x10-40	1.44500x10-38	1.41551	3956.47	5600.42
229.11977	430	430-5	HMDB0035017	2-Phenylethyl 3-methylbutanoate	Fatty Acyls	C13H18O2	+Na	0.575937	Pos	1.48659	2.55395x10-40	1.44500x10-38	1.41551	3956.47	5600.42
241.08280	472	472-1	HMDB0040358	(R)-Bitalin A	Benzene and substituted derivatives	C13H14O3	+Na	3.24189	Pos	1.48095	8.99195x10-25	1.36146x10-23	1.24082	8454.4	10490.4
241.08280	472	472-2	HMDB0250015	(S,E)-2-(5-Hydroxy-8,9-dihydro-5H-benzo[7]annulen-6(7H)-ylidene)acetic acid	Unclassified	C13H14O3	+Na	3.24189	Pos	1.48095	8.99195x10-25	1.36146x10-23	1.24082	8454.4	10490.4
241.08280	472	472-3	HMDB0256835	Propranolol glycol	Naphthalenes	C13H14O3	+Na	3.24189	Pos	1.48095	8.99195x10-25	1.36146x10-23	1.24082	8454.4	10490.4
152.04708	137	137-1	HMDB0011664	3-Methylene-indolenine	Indoles and derivatives	C9H7N	+Na	0.108434	Pos	1.40667	4.72307x10-21	5.40138x10-20	1.24486	8122.76	10111.7
365.15622	784	784-2	HMDB0255070	N-acetylmuramoyl-L-alanine	Organooxygen compounds	C14H24N2O9	+H	2.0477	Pos	1.39898	1.08788x10-33	3.43963x10-32	0.645319	4339.23	2800.19
365.15622	784	784-3	HMDB0255071	n-acetylmuramyl-l-alanine	Carboxylic acids and derivatives	C14H24N2O9	+H	2.0477	Pos	1.39898	1.08788x10-33	3.43963x10-32	0.645319	4339.23	2800.19
365.15622	784	784-1	HMDB0060494	N-Acetylmuramoyl-Ala	Organooxygen compounds	C14H24N2O9	+H	2.0477	Pos	1.39898	1.08788x10-33	3.43963x10-32	0.645319	4339.23	2800.19
215.06733	371	371-2	HMDB0253800	Kifunensine	Carboxylic acids and derivatives	C8H12N2O6	+H-H2O	0.0466515	Pos	1.38011	5.46330x10-30	1.12943x10-28	1.30986	5163.18	6763.03
215.06733	371	371-3	HMDB0257975	(2S)-5-Amino-2-[(2-carboxy-2-oxoethyl)amino]-5-oxopentanoic acid	Carboxylic acids and derivatives	C8H12N2O6	+H-H2O	0.0466515	Pos	1.38011	5.46330x10-30	1.12943x10-28	1.30986	5163.18	6763.03
215.06733	371	371-1	HMDB0252812	Glutamine pyruvate	Carboxylic acids and derivatives	C8H12N2O6	+H-H2O	0.0466515	Pos	1.38011	5.46330x10-30	1.12943x10-28	1.30986	5163.18	6763.03
165.08826	183	183-3	HMDB0013903	(3Z)-2-Propylpent-3-enoic acid	Fatty Acyls	C8H14O2	+Na	2.20751	Pos	1.37759	7.27111x10-33	2.00422x10-31	1.37051	3917.53	5369.02
165.08826	183	183-1	HMDB0013897	4-ene-Valproic acid	Fatty Acyls	C8H14O2	+Na	2.20751	Pos	1.37759	7.27111x10-33	2.00422x10-31	1.37051	3917.53	5369.02
165.08826	183	183-2	HMDB0013902	2-ene-Valproic acid	Fatty Acyls	C8H14O2	+Na	2.20751	Pos	1.37759	7.27111x10-33	2.00422x10-31	1.37051	3917.53	5369.02
165.08826	183	183-6	HMDB0040215	cis-3-Hexenyl acetate	Carboxylic acids and derivatives	C8H14O2	+Na	2.20751	Pos	1.37759	7.27111x10-33	2.00422x10-31	1.37051	3917.53	5369.02
165.08826	183	183-4	HMDB0031293	2,3-Octanedione	Organooxygen compounds	C8H14O2	+Na	2.20751	Pos	1.37759	7.27111x10-33	2.00422x10-31	1.37051	3917.53	5369.02
165.08826	183	183-5	HMDB0031343	Methyl cyclohexanecarboxylate	Carboxylic acids and derivatives	C8H14O2	+Na	2.20751	Pos	1.37759	7.27111x10-33	2.00422x10-31	1.37051	3917.53	5369.02
647.33186	1751	1751-2	HMDB0266664	PA(22:6(5Z,7Z,10Z,13Z,16Z,19Z)-OH(4)/8:0)	Unclassified	C33H53O9P	+Na	0.114813	Pos	1.34867	7.99298x10-19	8.26198x10-18	0.436106	3337.75	1455.61
647.33186	1751	1751-3	HMDB0266665	PA(8:0/22:6(4Z,8Z,10Z,13Z,16Z,19Z)-OH(7))	Unclassified	C33H53O9P	+Na	0.114813	Pos	1.34867	7.99298x10-19	8.26198x10-18	0.436106	3337.75	1455.61
647.33186	1751	1751-4	HMDB0266666	PA(22:6(4Z,8Z,10Z,13Z,16Z,19Z)-OH(7)/8:0)	Unclassified	C33H53O9P	+Na	0.114813	Pos	1.34867	7.99298x10-19	8.26198x10-18	0.436106	3337.75	1455.61
647.33186	1751	1751-6	HMDB0266668	PA(22:6(4Z,7Z,10Z,12E,16Z,19Z)-OH(14)/8:0)	Unclassified	C33H53O9P	+Na	0.114813	Pos	1.34867	7.99298x10-19	8.26198x10-18	0.436106	3337.75	1455.61
647.33186	1751	1751-7	HMDB0266669	PA(8:0/22:6(4Z,7Z,10Z,13E,15E,19Z)-OH(17))	Unclassified	C33H53O9P	+Na	0.114813	Pos	1.34867	7.99298x10-19	8.26198x10-18	0.436106	3337.75	1455.61
647.33186	1751	1751-8	HMDB0266670	PA(22:6(4Z,7Z,10Z,13E,15E,19Z)-OH(17)/8:0)	Unclassified	C33H53O9P	+Na	0.114813	Pos	1.34867	7.99298x10-19	8.26198x10-18	0.436106	3337.75	1455.61
647.33186	1751	1751-5	HMDB0266667	PA(8:0/22:6(4Z,7Z,10Z,12E,16Z,19Z)-OH(14))	Unclassified	C33H53O9P	+Na	0.114813	Pos	1.34867	7.99298x10-19	8.26198x10-18	0.436106	3337.75	1455.61
647.33186	1751	1751-10	HMDB0266674	PA(22:5(4Z,7Z,10Z,13Z,19Z)-O(16,17)/8:0)	Unclassified	C33H53O9P	+Na	0.114813	Pos	1.34867	7.99298x10-19	8.26198x10-18	0.436106	3337.75	1455.61
647.33186	1751	1751-9	HMDB0266673	PA(8:0/22:5(4Z,7Z,10Z,13Z,19Z)-O(16,17))	Unclassified	C33H53O9P	+Na	0.114813	Pos	1.34867	7.99298x10-19	8.26198x10-18	0.436106	3337.75	1455.61
647.33186	1751	1751-1	HMDB0266663	PA(8:0/22:6(5Z,7Z,10Z,13Z,16Z,19Z)-OH(4))	Unclassified	C33H53O9P	+Na	0.114813	Pos	1.34867	7.99298x10-19	8.26198x10-18	0.436106	3337.75	1455.61
197.05741	297	297-3	HMDB0060683	2-n-Propyl-4-oxopentanoic acid	Keto acids and derivatives	C8H14O3	+K	0.221217	Pos	1.34007	9.59115x10-33	2.57762x10-31	1.3387	4287.34	5739.45
197.05741	297	297-1	HMDB0000451	cis-4-Hydroxycyclohexylacetic acid	Organooxygen compounds	C8H14O3	+K	0.221217	Pos	1.34007	9.59115x10-33	2.57762x10-31	1.3387	4287.34	5739.45
197.05741	297	297-2	HMDB0000909	trans-4-Hydroxycyclohexylacetic acid	Organooxygen compounds	C8H14O3	+K	0.221217	Pos	1.34007	9.59115x10-33	2.57762x10-31	1.3387	4287.34	5739.45
197.05741	297	297-4	HMDB0060685	3-Oxovalproic acid	Keto acids and derivatives	C8H14O3	+K	0.221217	Pos	1.34007	9.59115x10-33	2.57762x10-31	1.3387	4287.34	5739.45
638.32631	1668	1668-1	HMDB0258927	Tetrapeptide	Peptidomimetics	C27H40N8O9	+NH4	0.798459	Pos	1.33074	3.02443x10-19	3.15656x10-18	0.426436	3205.86	1367.09
283.12975	645	645-1	HMDB0036456	10-Hydroxy-3-methoxy-1,3,5,7-cadinatetraen-9-one	Prenol lipids	C16H20O3	+Na	2.55509	Pos	1.31953	1.67107x10-24	2.46082x10-23	1.28863	5524.41	7118.94
211.07261	354	354-1	HMDB0000012	Deoxyuridine	Pyrimidine nucleosides	C9H12N2O5	+H-H2O	0.859248	Pos	1.31371	8.69125x10-28	1.61088x10-26	1.29289	5028.35	6501.13
296.06536	685	685-1	HMDB0000982	5-Methylcytidine	Pyrimidine nucleosides	C10H15N3O5	+K	3.45883	Pos	1.30786	1.86250x10-23	2.53442x10-22	1.44726	3683.29	5330.68
163.97766	177	177-1	HMDB0000251	Taurine	Organic sulfonic acids and derivatives	C2H7NO3S	+K	1.04584	Pos	1.30704	7.51720x10-28	1.41772x10-26	0.665107	4476.47	2977.33
195.04138	286	286-1	HMDB0001892	Menadione	Naphthalenes	C11H8O2	+Na	1.35464	Pos	1.29134	2.05838x10-29	4.09770x10-28	1.29217	4795.73	6196.88
366.96073	787	787-1	HMDB0041856	Chlorpyrifos	Organic thiophosphoric acids and derivatives	C9H11Cl3NO3PS	+NH4	1.60883	Pos	1.28452	5.28552x10-27	9.46990x10-26	1.2901	4926.97	6356.31
453.20877	842	842-1	HMDB0253951	Lactose-lysine	Saccharolipids	C18H34N2O12	+H-H2O	0.471739	Pos	1.28008	5.51466x10-32	1.37866x10-30	0.562216	3084.17	1733.97
327.19272	751	751-1	HMDB0245639	N-Benzyl-9-(tetrahydro-2H-pyran-2-YL)adenine	Imidazopyrimidines	C17H19N5O	+NH4	0.459366	Pos	1.27117	1.93777x10-21	2.26424x10-20	1.26182	6084.93	7678.09
275.14006	618	618-2	HMDB0033514	Fusarochromanone	Benzopyrans	C15H20N2O4	+H-H2O	0.216916	Pos	1.26544	3.94204x10-33	1.14532x10-31	1.45502	2813.28	4093.38
275.14006	618	618-1	HMDB0011687	Phenylbutyrylglutamine	Carboxylic acids and derivatives	C15H20N2O4	+H-H2O	0.216916	Pos	1.26544	3.94204x10-33	1.14532x10-31	1.45502	2813.28	4093.38
210.19596	351	351-3	HMDB0259120	Trenbolone acetate	Pyrrolidines	C12H20N2	+NH4	2.53206	Pos	1.256	2.68115x10-25	4.23859x10-24	1.33465	4188.93	5590.74
210.19596	351	351-2	HMDB0252283	Hydroxypropylcellulose	Benzene and substituted derivatives	C12H20N2	+NH4	2.53206	Pos	1.256	2.68115x10-25	4.23859x10-24	1.33465	4188.93	5590.74
210.19596	351	351-1	HMDB0248301	Amiflamina	Benzene and substituted derivatives	C12H20N2	+NH4	2.53206	Pos	1.256	2.68115x10-25	4.23859x10-24	1.33465	4188.93	5590.74
213.14555	363	363-1	HMDB0247132	2-Amino-4-hydroxy-6,7-dimethyl-5,6,7,8-tetrahydropteridine	Pteridines and derivatives	C8H13N5O	+NH4	1.63089	Pos	1.25553	2.48865x10-25	3.99298x10-24	1.28498	4956.39	6368.89
166.95029	186	186-1	HMDB0257619	Phosphoric acid hydroxymethyl ester	Organic phosphoric acids and derivatives	CH5O5P	+K	2.25908	Pos	1.25087	4.39498x10-30	9.26394x10-29	1.47052	2832.42	4165.14
289.14047	661	661-1	HMDB0259987	zaprinast	Triazolopyrimidines	C13H13N5O2	+NH4	1.022	Pos	1.24474	1.16148x10-25	1.92091x10-24	1.26392	5294.2	6691.42
223.10896	402	402-1	HMDB0035076	2-(2-Methylpropoxy)naphthalene	Naphthalenes	C14H16O	+Na	1.92936	Pos	1.23948	7.82673x10-35	2.62929x10-33	1.5019	2387.97	3586.5
691.35753	2065	2065-1	HMDB0262711	PA(10:0/22:6(5Z,8E,10Z,13Z,15E,19Z)-2OH(7S, 17S))	Unclassified	C35H57O10P	+Na	0.907443	Pos	1.23694	3.21751x10-16	2.68126x10-15	0.428255	3162.39	1354.31
691.35753	2065	2065-2	HMDB0262712	PA(22:6(5Z,8E,10Z,13Z,15E,19Z)-2OH(7S, 17S)/10:0)	Unclassified	C35H57O10P	+Na	0.907443	Pos	1.23694	3.21751x10-16	2.68126x10-15	0.428255	3162.39	1354.31
691.35753	2065	2065-4	HMDB0262728	PA(22:6(4Z,7Z,11E,13Z,15E,19Z)-2OH(10S,17)/10:0)	Unclassified	C35H57O10P	+Na	0.907443	Pos	1.23694	3.21751x10-16	2.68126x10-15	0.428255	3162.39	1354.31
691.35753	2065	2065-3	HMDB0262727	PA(10:0/22:6(4Z,7Z,11E,13Z,15E,19Z)-2OH(10S,17))	Unclassified	C35H57O10P	+Na	0.907443	Pos	1.23694	3.21751x10-16	2.68126x10-15	0.428255	3162.39	1354.31
826.57013	2636	2636-1	HMDB0008915	PE(39:1)	Glycerophospholipids	C44H86NO8P	+K	2.60628	Pos	1.23574	1.20358x10-15	9.37572x10-15	1.40244	4473.72	6274.11
798.53958	2564	2564-1	HMDB0009644	PE(22:6)	Glycerophospholipids	C45H78NO7P	+Na	1.71032	Pos	1.23095	3.66340x10-09	1.34408x10-08	1.23031	10173.3	12516.3
798.53958	2564	2564-2	HMDB0011394	PE(40:7)	Glycerophospholipids	C45H78NO7P	+Na	1.71032	Pos	1.23095	3.66340x10-09	1.34408x10-08	1.23031	10173.3	12516.3
122.94539	61	61-1	HMDB0303537	Potassium hydrogen carbonate	Organic carbonic acids and derivatives	CHKO3	+Na	0.85981	Pos	1.22608	3.90027x10-32	9.98285x10-31	1.50378	2416.93	3634.53
626.32503	1536	1536-1	HMDB0030172	Oxyacanthine	Unclassified	C37H40N2O6	+NH4	4.03612	Pos	1.21743	1.52950x10-17	1.40531x10-16	0.390321	2674.87	1044.06
626.32503	1536	1536-2	HMDB0242612	Fangchinoline	Unclassified	C37H40N2O6	+NH4	4.03612	Pos	1.21743	1.52950x10-17	1.40531x10-16	0.390321	2674.87	1044.06
626.32503	1536	1536-3	HMDB0242681	BERBAMINE	Unclassified	C37H40N2O6	+NH4	4.03612	Pos	1.21743	1.52950x10-17	1.40531x10-16	0.390321	2674.87	1044.06
187.03656	259	259-2	HMDB0001713	m-Coumaric acid	Cinnamic acids and derivatives	C9H8O3	+Na	0.0102071	Pos	1.20234	6.34463x10-27	1.11811x10-25	1.29713	4396.59	5702.97
187.03656	259	259-1	HMDB0000205	Phenylpyruvic acid	Benzene and substituted derivatives	C9H8O3	+Na	0.0102071	Pos	1.20234	6.34463x10-27	1.11811x10-25	1.29713	4396.59	5702.97
187.03656	259	259-5	HMDB0012225	Enol-phenylpyruvate	Benzene and substituted derivatives	C9H8O3	+Na	0.0102071	Pos	1.20234	6.34463x10-27	1.11811x10-25	1.29713	4396.59	5702.97
187.03656	259	259-3	HMDB0002035	4-Hydroxycinnamic acid	Cinnamic acids and derivatives	C9H8O3	+Na	0.0102071	Pos	1.20234	6.34463x10-27	1.11811x10-25	1.29713	4396.59	5702.97
187.03656	259	259-4	HMDB0002641	2-Hydroxycinnamic acid	Cinnamic acids and derivatives	C9H8O3	+Na	0.0102071	Pos	1.20234	6.34463x10-27	1.11811x10-25	1.29713	4396.59	5702.97
187.03656	259	259-6	HMDB0030677	cis-p-Coumaric acid	Cinnamic acids and derivatives	C9H8O3	+Na	0.0102071	Pos	1.20234	6.34463x10-27	1.11811x10-25	1.29713	4396.59	5702.97
297.14571	688	688-2	HMDB0060388	4-Hydroxy-3-polyprenylbenzoate	Prenol lipids	C17H22O3	+Na	1.3665	Pos	1.19867	1.23808x10-21	1.47882x10-20	1.26555	5352.98	6774.48
297.14571	688	688-1	HMDB0060354	2-Polyprenyl-6-methoxy-1,4-benzoquinone	Prenol lipids	C17H22O3	+Na	1.3665	Pos	1.19867	1.23808x10-21	1.47882x10-20	1.26555	5352.98	6774.48
348.98895	773	773-1	HMDB0031781	O-Ethyl S,S-diphenyl phosphorodithioate	Benzene and substituted derivatives	C14H15O2PS2	+K	1.84085	Pos	1.19565	5.19970x10-23	6.81667x10-22	1.27301	4484.91	5709.32
409.18217	816	816-3	HMDB0035212	Sonchuionoside C	Prenol lipids	C19H30O8	+Na	2.80475	Pos	1.19269	2.63721x10-26	4.50001x10-25	0.6569	3757.25	2468.14
409.18217	816	816-1	HMDB0029772	Corchoionol C 9-glucoside	Fatty Acyls	C19H30O8	+Na	2.80475	Pos	1.19269	2.63721x10-26	4.50001x10-25	0.6569	3757.25	2468.14
409.18217	816	816-2	HMDB0030370	Citroside A	Prenol lipids	C19H30O8	+Na	2.80475	Pos	1.19269	2.63721x10-26	4.50001x10-25	0.6569	3757.25	2468.14
497.23490	865	865-1	HMDB0249158	Betamethasone 17-benzoate	Steroids and steroid derivatives	C29H33FO6	+H	2.87074	Pos	1.19059	2.79354x10-29	5.46010x10-28	0.493295	2353.71	1161.07
541.26086	888	888-1	HMDB0031935	Blumenol C O-[rhamnosyl-(1->6)-glucoside]	Fatty Acyls	C25H42O11	+Na	2.04918	Pos	1.18902	1.08935x10-31	2.60233x10-30	0.384001	1848.44	709.803
810.59796	2598	2598-1	HMDB0007988	PC(38:4)	Glycerophospholipids	C46H84NO8P	+H	3.53915	Pos	1.16423	3.13483x10-14	2.11946x10-13	1.45892	3508.43	5118.51
810.59796	2598	2598-2	HMDB0113104	MMPE(40:4)	Glycerophospholipids	C46H84NO8P	+H	3.53915	Pos	1.16423	3.13483x10-14	2.11946x10-13	1.45892	3508.43	5118.51
653.34166	1812	1812-1	HMDB0033242	Glycylserylprolylmethionylphenylalanylvalinamide	Carboxylic acids and derivatives	C29H45N7O7S	+NH4	3.49247	Pos	1.15829	5.67560x10-18	5.39936x10-17	0.378734	2218	840.031
217.08312	377	377-1	HMDB0011169	L-beta-aspartyl-L-threonine	Peptidomimetics	C8H14N2O6	+H-H2O	0.579153	Pos	1.15174	1.77885x10-24	2.58414x10-23	1.34419	3602.74	4842.75
217.08312	377	377-2	HMDB0028763	Aspartyl-Threonine	Carboxylic acids and derivatives	C8H14N2O6	+H-H2O	0.579153	Pos	1.15174	1.77885x10-24	2.58414x10-23	1.34419	3602.74	4842.75
249.12482	504	504-1	HMDB0249257	Bis(ethylphenyl)ether	Benzene and substituted derivatives	C16H18O	+Na	0.639106	Pos	1.14779	1.68238x10-30	3.61711x10-29	1.55994	2007.03	3130.85
705.13053	2141	2141-1	HMDB0037460	Tricin 7-diglucuronoside	Flavonoids	C29H30O19	+Na	4.35762	Pos	1.13816	1.37559x10-15	1.06386x10-14	1.27278	5378.19	6845.23
325.17702	748	748-1	HMDB0000380	2-Hydroxyestradiol-3-methyl ether	Carboxylic acids and derivatives	C19H26O3	+Na	1.34948	Pos	1.13528	3.00445x10-16	2.56332x10-15	1.20148	7343.78	8823.43
325.17702	748	748-4	HMDB0003959	19-Oxotestosterone	Steroids and steroid derivatives	C19H26O3	+Na	1.34948	Pos	1.13528	3.00445x10-16	2.56332x10-15	1.20148	7343.78	8823.43
325.17702	748	748-5	HMDB0006771	7a-Hydroxyandrost-4-ene-3,17-dione	Steroids and steroid derivatives	C19H26O3	+Na	1.34948	Pos	1.13528	3.00445x10-16	2.56332x10-15	1.20148	7343.78	8823.43
325.17702	748	748-3	HMDB0003955	19-Hydroxyandrost-4-ene-3,17-dione	Steroids and steroid derivatives	C19H26O3	+Na	1.34948	Pos	1.13528	3.00445x10-16	2.56332x10-15	1.20148	7343.78	8823.43
325.17702	748	748-8	HMDB0012782	4-Methoxy-17beta-estradiol	Steroids and steroid derivatives	C19H26O3	+Na	1.34948	Pos	1.13528	3.00445x10-16	2.56332x10-15	1.20148	7343.78	8823.43
325.17702	748	748-9	HMDB0031038	(2Z,8S,9Z)-2,9-Heptadecadiene-8-hydroxy-4,6-diyne-1-yl acetate	Fatty Acyls	C19H26O3	+Na	1.34948	Pos	1.13528	3.00445x10-16	2.56332x10-15	1.20148	7343.78	8823.43
325.17702	748	748-2	HMDB0000405	2-Methoxyestradiol	Steroids and steroid derivatives	C19H26O3	+Na	1.34948	Pos	1.13528	3.00445x10-16	2.56332x10-15	1.20148	7343.78	8823.43
325.17702	748	748-11	HMDB0034028	2-(3,7-Dimethyl-2,6-octadienyl)-4-hydroxy-6-methoxyacetophenone	Organooxygen compounds	C19H26O3	+Na	1.34948	Pos	1.13528	3.00445x10-16	2.56332x10-15	1.20148	7343.78	8823.43
325.17702	748	748-12	HMDB0034167	Falcarindiol 3-acetate	Fatty Acyls	C19H26O3	+Na	1.34948	Pos	1.13528	3.00445x10-16	2.56332x10-15	1.20148	7343.78	8823.43
325.17702	748	748-13	HMDB0036696	Yucalexin B'11	Organooxygen compounds	C19H26O3	+Na	1.34948	Pos	1.13528	3.00445x10-16	2.56332x10-15	1.20148	7343.78	8823.43
325.17702	748	748-14	HMDB0039568	Ginsenoyne H	Carboxylic acids and derivatives	C19H26O3	+Na	1.34948	Pos	1.13528	3.00445x10-16	2.56332x10-15	1.20148	7343.78	8823.43
325.17702	748	748-15	HMDB0040927	2-Hexyl-5-[2-(4-hydroxy-3-methoxyphenyl)ethyl]furan	Fatty Acyls	C19H26O3	+Na	1.34948	Pos	1.13528	3.00445x10-16	2.56332x10-15	1.20148	7343.78	8823.43
325.17702	748	748-16	HMDB0041204	Acetylpanaxydol	Carboxylic acids and derivatives	C19H26O3	+Na	1.34948	Pos	1.13528	3.00445x10-16	2.56332x10-15	1.20148	7343.78	8823.43
325.17702	748	748-17	HMDB0242733	4-Androsten-4-ol-3,17-dione	Steroids and steroid derivatives	C19H26O3	+Na	1.34948	Pos	1.13528	3.00445x10-16	2.56332x10-15	1.20148	7343.78	8823.43
325.17702	748	748-18	HMDB0243551	Bioallethrin	Fatty Acyls	C19H26O3	+Na	1.34948	Pos	1.13528	3.00445x10-16	2.56332x10-15	1.20148	7343.78	8823.43
325.17702	748	748-6	HMDB0006773	11b-Hydroxyandrost-4-ene-3,17-dione	Oxazinanes	C19H26O3	+Na	1.34948	Pos	1.13528	3.00445x10-16	2.56332x10-15	1.20148	7343.78	8823.43
325.17702	748	748-7	HMDB0006774	16a-Hydroxyandrost-4-ene-3,17-dione	Steroids and steroid derivatives	C19H26O3	+Na	1.34948	Pos	1.13528	3.00445x10-16	2.56332x10-15	1.20148	7343.78	8823.43
325.17702	748	748-21	HMDB0245198	2-Methoxy-17alpha-estradiol	Steroids and steroid derivatives	C19H26O3	+Na	1.34948	Pos	1.13528	3.00445x10-16	2.56332x10-15	1.20148	7343.78	8823.43
325.17702	748	748-22	HMDB0246470	(8R,9S,10R,13S,14S)-4-Hydroxy-10,13-dimethyl-1,6,7,8,9,10,11,12,13,14,15,16-dodecahydro-2H-cyclopenta[a]phenanthrene-3,17-dione	Steroids and steroid derivatives	C19H26O3	+Na	1.34948	Pos	1.13528	3.00445x10-16	2.56332x10-15	1.20148	7343.78	8823.43
325.17702	748	748-23	HMDB0246490	4-Methoxy-17alpha-estradiol	Steroids and steroid derivatives	C19H26O3	+Na	1.34948	Pos	1.13528	3.00445x10-16	2.56332x10-15	1.20148	7343.78	8823.43
325.17702	748	748-24	HMDB0247266	7-Keto-dehydroepiandrosterone	Steroids and steroid derivatives	C19H26O3	+Na	1.34948	Pos	1.13528	3.00445x10-16	2.56332x10-15	1.20148	7343.78	8823.43
325.17702	748	748-25	HMDB0251855	EPIMESTROL	Steroids and steroid derivatives	C19H26O3	+Na	1.34948	Pos	1.13528	3.00445x10-16	2.56332x10-15	1.20148	7343.78	8823.43
325.17702	748	748-26	HMDB0257882	(8R,9S,13S,14S,17S)-13-Methyl-3-methylperoxy-6,7,8,9,11,12,14,15,16,17-decahydrocyclopenta[a]phenanthren-17-ol	Steroids and steroid derivatives	C19H26O3	+Na	1.34948	Pos	1.13528	3.00445x10-16	2.56332x10-15	1.20148	7343.78	8823.43
325.17702	748	748-27	HMDB0258073	(8S,9R,10R,13S,14S)-11-Hydroxy-10,13-dimethyl-5,6,7,8,9,11,12,14,15,16-decahydro-4H-cyclopenta[a]phenanthrene-3,17-dione	Steroids and steroid derivatives	C19H26O3	+Na	1.34948	Pos	1.13528	3.00445x10-16	2.56332x10-15	1.20148	7343.78	8823.43
325.17702	748	748-28	HMDB0258855	Testololactone	Naphthopyrans	C19H26O3	+Na	1.34948	Pos	1.13528	3.00445x10-16	2.56332x10-15	1.20148	7343.78	8823.43
325.17702	748	748-29	HMDB0260174	(8R,9S,10R,13S,14S,17S)-17-Hydroxy-10,13-dimethyl-6,7,8,9,11,12,14,15,16,17-decahydro-1H-cyclopenta[a]phenanthrene-2,3-dione	Steroids and steroid derivatives	C19H26O3	+Na	1.34948	Pos	1.13528	3.00445x10-16	2.56332x10-15	1.20148	7343.78	8823.43
325.17702	748	748-19	HMDB0244360	(8R,9R,10S,11S,13R,14R)-11-Hydroxy-10,13-dimethyl-2,6,7,8,9,11,12,14,15,16-decahydro-1H-cyclopenta[a]phenanthrene-3,17-dione	Steroids and steroid derivatives	C19H26O3	+Na	1.34948	Pos	1.13528	3.00445x10-16	2.56332x10-15	1.20148	7343.78	8823.43
325.17702	748	748-20	HMDB0244364	11-Ketotestosterone	Steroids and steroid derivatives	C19H26O3	+Na	1.34948	Pos	1.13528	3.00445x10-16	2.56332x10-15	1.20148	7343.78	8823.43
325.17702	748	748-10	HMDB0033125	[8]-Dehydroshogaol	Cinnamic acids and derivatives	C19H26O3	+Na	1.34948	Pos	1.13528	3.00445x10-16	2.56332x10-15	1.20148	7343.78	8823.43
413.26550	821	821-1	HMDB0241416	Tetradeca-5,8,11-trienedioylcarnitine	Fatty Acyls	C21H33NO6	+NH4	2.12425	Pos	1.12775	2.09524x10-09	8.13136x10-09	1.13794	13272.1	15102.8
413.26550	821	821-2	HMDB0241417	Tetradeca-8,10,12-trienedioylcarnitine	Fatty Acyls	C21H33NO6	+NH4	2.12425	Pos	1.12775	2.09524x10-09	8.13136x10-09	1.13794	13272.1	15102.8
413.26550	821	821-5	HMDB0241420	Tetradeca-7,9,11-trienedioylcarnitine	Fatty Acyls	C21H33NO6	+NH4	2.12425	Pos	1.12775	2.09524x10-09	8.13136x10-09	1.13794	13272.1	15102.8
413.26550	821	821-6	HMDB0241421	Tetradeca-6,8,10-trienedioylcarnitine	Fatty Acyls	C21H33NO6	+NH4	2.12425	Pos	1.12775	2.09524x10-09	8.13136x10-09	1.13794	13272.1	15102.8
413.26550	821	821-7	HMDB0241422	Tetradeca-4,7,10-trienedioylcarnitine	Fatty Acyls	C21H33NO6	+NH4	2.12425	Pos	1.12775	2.09524x10-09	8.13136x10-09	1.13794	13272.1	15102.8
413.26550	821	821-8	HMDB0241423	Tetradeca-6,9,12-trienedioylcarnitine	Fatty Acyls	C21H33NO6	+NH4	2.12425	Pos	1.12775	2.09524x10-09	8.13136x10-09	1.13794	13272.1	15102.8
413.26550	821	821-3	HMDB0241418	Tetradeca-5,7,9-trienedioylcarnitine	Fatty Acyls	C21H33NO6	+NH4	2.12425	Pos	1.12775	2.09524x10-09	8.13136x10-09	1.13794	13272.1	15102.8
413.26550	821	821-4	HMDB0241419	(2E,4Z,10Z)-Tetradeca-2,4,10-trienedioylcarnitine	Fatty Acyls	C21H33NO6	+NH4	2.12425	Pos	1.12775	2.09524x10-09	8.13136x10-09	1.13794	13272.1	15102.8
245.07771	486	486-3	HMDB0062501	N-Acetyl-serylaspartic acid	Carboxylic acids and derivatives	C9H14N2O7	+H-H2O	0.830623	Pos	1.12455	1.98747x10-20	2.20261x10-19	1.2355	5211.91	6439.33
245.07771	486	486-2	HMDB0028815	Glutamylaspartic acid	Peptidomimetics	C9H14N2O7	+H-H2O	0.830623	Pos	1.12455	1.98747x10-20	2.20261x10-19	1.2355	5211.91	6439.33
245.07771	486	486-1	HMDB0028752	Aspartyl-Glutamate	Carboxylic acids and derivatives	C9H14N2O7	+H-H2O	0.830623	Pos	1.12455	1.98747x10-20	2.20261x10-19	1.2355	5211.91	6439.33
669.56178	1936	1936-1	HMDB0290224	CE(20:4(6E,8Z,11Z,14Z)+=O(5))	Unclassified	C47H74O3	+H-H2O	0.265456	Pos	1.12341	6.88247x10-14	4.56707x10-13	0.453333	2883.89	1307.36
669.56178	1936	1936-2	HMDB0290225	CE(20:4(5Z,8Z,11Z,13E)+=O(15))	Unclassified	C47H74O3	+H-H2O	0.265456	Pos	1.12341	6.88247x10-14	4.56707x10-13	0.453333	2883.89	1307.36
669.56178	1936	1936-5	HMDB0290233	CE(20:5(5Z,8Z,10E,14Z,17Z)-OH(12))	Unclassified	C47H74O3	+H-H2O	0.265456	Pos	1.12341	6.88247x10-14	4.56707x10-13	0.453333	2883.89	1307.36
669.56178	1936	1936-6	HMDB0290234	CE(20:5(6E,8Z,11Z,14Z,17Z)-OH(5))	Unclassified	C47H74O3	+H-H2O	0.265456	Pos	1.12341	6.88247x10-14	4.56707x10-13	0.453333	2883.89	1307.36
669.56178	1936	1936-3	HMDB0290231	CE(20:5(5Z,8Z,11Z,14Z,16E)-OH(18R))	Unclassified	C47H74O3	+H-H2O	0.265456	Pos	1.12341	6.88247x10-14	4.56707x10-13	0.453333	2883.89	1307.36
669.56178	1936	1936-4	HMDB0290232	CE(20:5(5Z,8Z,11Z,14Z,16E)-OH(18))	Unclassified	C47H74O3	+H-H2O	0.265456	Pos	1.12341	6.88247x10-14	4.56707x10-13	0.453333	2883.89	1307.36
350.98617	775	775-1	HMDB0258411	N-Succinimidyl 3-(2-pyridyldithio)propionate	Pyridines and derivatives	C12H12N2O4S2	+K	2.52071	Pos	1.12178	9.29534x10-22	1.12275x10-20	1.26688	4381.87	5551.32
557.09424	924	924-1	HMDB0257286	Rocepafant	Thienodiazepines	C26H23ClN6OS2	+Na	2.40594	Pos	1.11975	1.11028x10-15	8.76697x10-15	1.18519	7714.94	9143.7
267.09891	584	584-2	HMDB0030731	3-(1,1-Dimethylallyl)herniarin	Coumarins and derivatives	C15H16O3	+Na	1.17966	Pos	1.10738	1.28677x10-20	1.45608x10-19	1.22007	5826.84	7109.14
267.09891	584	584-3	HMDB0031925	5-Hydroxy-2-(5-methyl-1-oxo-4-hexenyl)benzofuran	Benzofurans	C15H16O3	+Na	1.17966	Pos	1.10738	1.28677x10-20	1.45608x10-19	1.22007	5826.84	7109.14
267.09891	584	584-5	HMDB0034723	Encelin	Prenol lipids	C15H16O3	+Na	1.17966	Pos	1.10738	1.28677x10-20	1.45608x10-19	1.22007	5826.84	7109.14
267.09891	584	584-1	HMDB0030636	Batatasin III	Stilbenes	C15H16O3	+Na	1.17966	Pos	1.10738	1.28677x10-20	1.45608x10-19	1.22007	5826.84	7109.14
267.09891	584	584-4	HMDB0032641	Batatasin IV	Stilbenes	C15H16O3	+Na	1.17966	Pos	1.10738	1.28677x10-20	1.45608x10-19	1.22007	5826.84	7109.14
267.09891	584	584-6	HMDB0038548	Glandulone B	Prenol lipids	C15H16O3	+Na	1.17966	Pos	1.10738	1.28677x10-20	1.45608x10-19	1.22007	5826.84	7109.14
195.07810	287	287-2	HMDB0031621	Cinnamylideneacetone	Benzene and substituted derivatives	C12H12O	+Na	0.341498	Pos	1.10143	8.03488x10-27	1.39315x10-25	1.38119	2839.67	3922.14
195.07810	287	287-1	HMDB0029688	2-Ethoxynaphthalene	Naphthalenes	C12H12O	+Na	0.341498	Pos	1.10143	8.03488x10-27	1.39315x10-25	1.38119	2839.67	3922.14
788.41696	2533	2533-1	HMDB0252925	L-Methioninamide, N-(5-amino-1-oxopentyl)-L-phenylalanyl-L-phenylalanyl-L-prolyl-N-methyl-L-leucyl-	Peptidomimetics	C40H59N7O6S	+Na	3.77896	Pos	1.08943	9.71684x10-16	7.85384x10-15	0.385448	2274.35	876.643
321.13001	739	739-1	HMDB0242669	(2S,3S,4R,5R)-5-(6-Aminopurin-9-yl)-N-cyclopropyl-3,4-dihydroxyoxolane-2-carboxamide	Purine nucleosides	C13H16N6O4	+H	1.89798	Pos	1.08613	5.48054x10-24	7.65141x10-23	0.746189	4290.46	3201.49
321.13001	739	739-2	HMDB0255782	(2S,3S,4S,5S)-2-(5-Amino-7-methyl-2,6,7,9,11-pentazatricyclo[6.3.1.04,12]dodeca-1(12),3,5,8,10-pentaen-2-yl)-5-(hydroxymethyl)oxolane-3,4-diol	Organooxygen compounds	C13H16N6O4	+H	1.89798	Pos	1.08613	5.48054x10-24	7.65141x10-23	0.746189	4290.46	3201.49
400.34104	810	810-2	HMDB0240783	O-Palmitoylcarnitine	Fatty Acyls	C23H45NO4	+H	2.8981	Pos	1.08283	3.60709x10-31	8.25026x10-30	0.368461	1602.45	590.442
400.34104	810	810-3	HMDB0240843	12-Methylpentadecanoylcarnitine	Fatty Acyls	C23H45NO4	+H	2.8981	Pos	1.08283	3.60709x10-31	8.25026x10-30	0.368461	1602.45	590.442
400.34104	810	810-1	HMDB0240774	L-Palmitoylcarnitine	Fatty Acyls	C23H45NO4	+H	2.8981	Pos	1.08283	3.60709x10-31	8.25026x10-30	0.368461	1602.45	590.442
400.34104	810	810-6	HMDB0240846	6-Methylpentadecanoylcarnitine	Fatty Acyls	C23H45NO4	+H	2.8981	Pos	1.08283	3.60709x10-31	8.25026x10-30	0.368461	1602.45	590.442
400.34104	810	810-7	HMDB0240847	11-Methylpentadecanoylcarnitine	Fatty Acyls	C23H45NO4	+H	2.8981	Pos	1.08283	3.60709x10-31	8.25026x10-30	0.368461	1602.45	590.442
400.34104	810	810-8	HMDB0240848	3-Methylpentadecanoylcarnitine	Fatty Acyls	C23H45NO4	+H	2.8981	Pos	1.08283	3.60709x10-31	8.25026x10-30	0.368461	1602.45	590.442
400.34104	810	810-9	HMDB0240849	8-Methylpentadecanoylcarnitine	Fatty Acyls	C23H45NO4	+H	2.8981	Pos	1.08283	3.60709x10-31	8.25026x10-30	0.368461	1602.45	590.442
400.34104	810	810-10	HMDB0240850	7-Methylpentadecanoylcarnitine	Fatty Acyls	C23H45NO4	+H	2.8981	Pos	1.08283	3.60709x10-31	8.25026x10-30	0.368461	1602.45	590.442
400.34104	810	810-11	HMDB0240851	13-Methylpentadecanoylcarnitine	Fatty Acyls	C23H45NO4	+H	2.8981	Pos	1.08283	3.60709x10-31	8.25026x10-30	0.368461	1602.45	590.442
400.34104	810	810-12	HMDB0240852	4-Methylpentadecanoylcarnitine	Fatty Acyls	C23H45NO4	+H	2.8981	Pos	1.08283	3.60709x10-31	8.25026x10-30	0.368461	1602.45	590.442
400.34104	810	810-13	HMDB0240853	14-Methylpentadecanoylcarnitine	Fatty Acyls	C23H45NO4	+H	2.8981	Pos	1.08283	3.60709x10-31	8.25026x10-30	0.368461	1602.45	590.442
400.34104	810	810-14	HMDB0241914	10-Methylpentadecanoylcarnitine	Fatty Acyls	C23H45NO4	+H	2.8981	Pos	1.08283	3.60709x10-31	8.25026x10-30	0.368461	1602.45	590.442
400.34104	810	810-4	HMDB0240844	9-Methylpentadecanoylcarnitine	Fatty Acyls	C23H45NO4	+H	2.8981	Pos	1.08283	3.60709x10-31	8.25026x10-30	0.368461	1602.45	590.442
400.34104	810	810-5	HMDB0240845	5-Methylpentadecanoylcarnitine	Fatty Acyls	C23H45NO4	+H	2.8981	Pos	1.08283	3.60709x10-31	8.25026x10-30	0.368461	1602.45	590.442
832.44324	2648	2648-1	HMDB0271083	PG(i-12:0/LTE4)	Unclassified	C41H72NO13PS	+H-H2O	0.922047	Pos	1.08178	1.00743x10-15	8.08199x10-15	0.319941	1891.37	605.126
832.44324	2648	2648-2	HMDB0271084	PG(LTE4/i-12:0)	Unclassified	C41H72NO13PS	+H-H2O	0.922047	Pos	1.08178	1.00743x10-15	8.08199x10-15	0.319941	1891.37	605.126
118.08624	52	52-2	HMDB0031648	2,4-Pentanedione	Organooxygen compounds	C5H8O2	+NH4	0.334078	Pos	1.07949	1.35600x10-13	8.58166x10-13	0.809462	8093.44	6551.33
118.08624	52	52-1	HMDB0031598	2,3-Pentanedione	Organooxygen compounds	C5H8O2	+NH4	0.334078	Pos	1.07949	1.35600x10-13	8.58166x10-13	0.809462	8093.44	6551.33
291.13475	668	668-1	HMDB0253569	Iprofenin	Carboxylic acids and derivatives	C15H20N2O5	+H-H2O	0.943915	Pos	1.07462	3.29233x10-24	4.65691x10-23	1.32407	3320.68	4396.81
241.04661	471	471-1	HMDB0247940	Acifran	Dihydrofurans	C12H10O4	+Na	2.15915	Pos	1.06633	1.72653x10-25	2.81215x10-24	1.34127	3088.26	4142.19
781.40379	2507	2507-1	HMDB0060732	25-O-Desacetyl rifabutin	Naphthofurans	C41H56N4O11	+H	2.47168	Pos	1.06009	8.89450x10-17	7.96799x10-16	0.381505	2002.2	763.85
782.56616	2513	2513-1	HMDB0007889	PC(36:4)	Glycerophospholipids	C44H80NO8P	+H	4.20738	Pos	1.05824	2.00288x10-08	6.58440x10-08	1.18619	9496.03	11264.1
782.56616	2513	2513-2	HMDB0113055	MMPE(38:4)	Glycerophospholipids	C44H80NO8P	+H	4.20738	Pos	1.05824	2.00288x10-08	6.58440x10-08	1.18619	9496.03	11264.1
782.56616	2513	2513-3	HMDB0113934	DMPE(37:4)	Glycerophospholipids	C44H80NO8P	+H	4.20738	Pos	1.05824	2.00288x10-08	6.58440x10-08	1.18619	9496.03	11264.1
782.56616	2513	2513-4	HMDB0244099	Dilinoleoylphosphatidylcholine	Glycerophospholipids	C44H80NO8P	+H	4.20738	Pos	1.05824	2.00288x10-08	6.58440x10-08	1.18619	9496.03	11264.1
233.15076	442	442-1	HMDB0253447	Indanidine	Benzopyrazoles	C11H13N5	+NH4	0.697557	Pos	1.05183	7.57860x10-25	1.16386x10-23	1.5498	1745.41	2705.03
825.43017	2630	2630-1	HMDB0033404	Quillaic acid 3-[galactosyl-(1->2)-glucuronide]	Prenol lipids	C42H64O16	+H	4.11296	Pos	1.04838	1.07586x10-15	8.56705x10-15	0.401446	2107.04	845.865
825.43017	2630	2630-2	HMDB0036943	Oleragenoside	Prenol lipids	C42H64O16	+H	4.11296	Pos	1.04838	1.07586x10-15	8.56705x10-15	0.401446	2107.04	845.865
825.43017	2630	2630-3	HMDB0039448	Licoricesaponin J2	Prenol lipids	C42H64O16	+H	4.11296	Pos	1.04838	1.07586x10-15	8.56705x10-15	0.401446	2107.04	845.865
825.43017	2630	2630-4	HMDB0039512	Periandrin III	Prenol lipids	C42H64O16	+H	4.11296	Pos	1.04838	1.07586x10-15	8.56705x10-15	0.401446	2107.04	845.865
259.09380	548	548-1	HMDB0011737	gamma-Glutamylglutamic acid	Carboxylic acids and derivatives	C10H16N2O7	+H-H2O	0.920121	Pos	1.03929	9.19608x10-23	1.17688x10-21	1.31538	3253.53	4279.64
247.16602	496	496-1	HMDB0013126	Butenylcarnitine	Fatty Acyls	C11H19NO4	+NH4	3.18597	Pos	1.03854	2.96794x10-21	3.43068x10-20	1.27719	3788.92	4839.15
171.04134	206	206-3	HMDB0040986	p-Coumaraldehyde	Cinnamaldehydes	C9H8O2	+Na	1.8062	Pos	1.03434	1.90141x10-23	2.55502x10-22	1.31186	3170.12	4158.76
171.04134	206	206-2	HMDB0000930	trans-Cinnamic acid	Cinnamic acids and derivatives	C9H8O2	+Na	1.8062	Pos	1.03434	1.90141x10-23	2.55502x10-22	1.31186	3170.12	4158.76
171.04134	206	206-1	HMDB0000567	Cinnamic acid	Cinnamic acids and derivatives	C9H8O2	+Na	1.8062	Pos	1.03434	1.90141x10-23	2.55502x10-22	1.31186	3170.12	4158.76
267.15587	587	587-1	HMDB0243858	1-Deoxy-1-morpholino-D-fructose	Oxazinanes	C10H19NO6	+NH4	3.01587	Pos	1.03208	2.91749x10-18	2.82550x10-17	1.19992	5346.07	6414.86
280.09122	634	634-1	HMDB0000086	Glycerophosphocholine	Glycerophospholipids	C8H20NO6P	+Na	3.01529	Pos	1.02308	5.98492x10-15	4.34715x10-14	1.28034	4168.23	5336.74
623.33114	1506	1506-1	HMDB0266583	PA(8:0/20:3(5Z,8Z,11Z)-O(14R,15S))	Unclassified	C31H53O9P	+Na	1.28009	Pos	1.00818	1.11728x10-15	8.76697x10-15	0.410416	2074.86	851.557
623.33114	1506	1506-4	HMDB0266586	PA(20:3(5Z,8Z,14Z)-O(11S,12R)/8:0)	Unclassified	C31H53O9P	+Na	1.28009	Pos	1.00818	1.11728x10-15	8.76697x10-15	0.410416	2074.86	851.557
623.33114	1506	1506-5	HMDB0266587	PA(8:0/20:3(5Z,11Z,14Z)-O(8,9))	Unclassified	C31H53O9P	+Na	1.28009	Pos	1.00818	1.11728x10-15	8.76697x10-15	0.410416	2074.86	851.557
623.33114	1506	1506-2	HMDB0266584	PA(20:3(5Z,8Z,11Z)-O(14R,15S)/8:0)	Unclassified	C31H53O9P	+Na	1.28009	Pos	1.00818	1.11728x10-15	8.76697x10-15	0.410416	2074.86	851.557
623.33114	1506	1506-3	HMDB0266585	PA(8:0/20:3(5Z,8Z,14Z)-O(11S,12R))	Unclassified	C31H53O9P	+Na	1.28009	Pos	1.00818	1.11728x10-15	8.76697x10-15	0.410416	2074.86	851.557
623.33114	1506	1506-8	HMDB0266590	PA(20:3(8Z,11Z,14Z)-O(5,6)/8:0)	Unclassified	C31H53O9P	+Na	1.28009	Pos	1.00818	1.11728x10-15	8.76697x10-15	0.410416	2074.86	851.557
623.33114	1506	1506-9	HMDB0266591	PA(8:0/20:4(5Z,8Z,11Z,14Z)-OH(20))	Unclassified	C31H53O9P	+Na	1.28009	Pos	1.00818	1.11728x10-15	8.76697x10-15	0.410416	2074.86	851.557
623.33114	1506	1506-10	HMDB0266592	PA(20:4(5Z,8Z,11Z,14Z)-OH(20)/8:0)	Unclassified	C31H53O9P	+Na	1.28009	Pos	1.00818	1.11728x10-15	8.76697x10-15	0.410416	2074.86	851.557
623.33114	1506	1506-11	HMDB0266593	PA(8:0/20:4(6E,8Z,11Z,14Z)-OH(5S))	Unclassified	C31H53O9P	+Na	1.28009	Pos	1.00818	1.11728x10-15	8.76697x10-15	0.410416	2074.86	851.557
623.33114	1506	1506-12	HMDB0266594	PA(20:4(6E,8Z,11Z,14Z)-OH(5S)/8:0)	Unclassified	C31H53O9P	+Na	1.28009	Pos	1.00818	1.11728x10-15	8.76697x10-15	0.410416	2074.86	851.557
623.33114	1506	1506-13	HMDB0266595	PA(8:0/20:4(5Z,8Z,11Z,14Z)-OH(19S))	Unclassified	C31H53O9P	+Na	1.28009	Pos	1.00818	1.11728x10-15	8.76697x10-15	0.410416	2074.86	851.557
623.33114	1506	1506-14	HMDB0266596	PA(20:4(5Z,8Z,11Z,14Z)-OH(19S)/8:0)	Unclassified	C31H53O9P	+Na	1.28009	Pos	1.00818	1.11728x10-15	8.76697x10-15	0.410416	2074.86	851.557
623.33114	1506	1506-15	HMDB0266597	PA(8:0/20:4(5Z,8Z,11Z,14Z)-OH(18R))	Unclassified	C31H53O9P	+Na	1.28009	Pos	1.00818	1.11728x10-15	8.76697x10-15	0.410416	2074.86	851.557
623.33114	1506	1506-16	HMDB0266598	PA(20:4(5Z,8Z,11Z,14Z)-OH(18R)/8:0)	Unclassified	C31H53O9P	+Na	1.28009	Pos	1.00818	1.11728x10-15	8.76697x10-15	0.410416	2074.86	851.557
623.33114	1506	1506-17	HMDB0266599	PA(8:0/20:4(5Z,8Z,11Z,14Z)-OH(17))	Unclassified	C31H53O9P	+Na	1.28009	Pos	1.00818	1.11728x10-15	8.76697x10-15	0.410416	2074.86	851.557
623.33114	1506	1506-18	HMDB0266600	PA(20:4(5Z,8Z,11Z,14Z)-OH(17)/8:0)	Unclassified	C31H53O9P	+Na	1.28009	Pos	1.00818	1.11728x10-15	8.76697x10-15	0.410416	2074.86	851.557
623.33114	1506	1506-6	HMDB0266588	PA(20:3(5Z,11Z,14Z)-O(8,9)/8:0)	Unclassified	C31H53O9P	+Na	1.28009	Pos	1.00818	1.11728x10-15	8.76697x10-15	0.410416	2074.86	851.557
623.33114	1506	1506-7	HMDB0266589	PA(8:0/20:3(8Z,11Z,14Z)-O(5,6))	Unclassified	C31H53O9P	+Na	1.28009	Pos	1.00818	1.11728x10-15	8.76697x10-15	0.410416	2074.86	851.557
623.33114	1506	1506-21	HMDB0266603	PA(8:0/20:4(5Z,8Z,11Z,13E)-OH(15S))	Unclassified	C31H53O9P	+Na	1.28009	Pos	1.00818	1.11728x10-15	8.76697x10-15	0.410416	2074.86	851.557
623.33114	1506	1506-22	HMDB0266604	PA(20:4(5Z,8Z,11Z,13E)-OH(15S)/8:0)	Unclassified	C31H53O9P	+Na	1.28009	Pos	1.00818	1.11728x10-15	8.76697x10-15	0.410416	2074.86	851.557
623.33114	1506	1506-23	HMDB0266605	PA(8:0/20:4(5Z,8Z,10E,14Z)-OH(12S))	Unclassified	C31H53O9P	+Na	1.28009	Pos	1.00818	1.11728x10-15	8.76697x10-15	0.410416	2074.86	851.557
623.33114	1506	1506-24	HMDB0266606	PA(20:4(5Z,8Z,10E,14Z)-OH(12S)/8:0)	Unclassified	C31H53O9P	+Na	1.28009	Pos	1.00818	1.11728x10-15	8.76697x10-15	0.410416	2074.86	851.557
623.33114	1506	1506-25	HMDB0266607	PA(8:0/20:4(5E,8Z,12Z,14Z)-OH(11R))	Unclassified	C31H53O9P	+Na	1.28009	Pos	1.00818	1.11728x10-15	8.76697x10-15	0.410416	2074.86	851.557
623.33114	1506	1506-26	HMDB0266608	PA(20:4(5E,8Z,12Z,14Z)-OH(11R)/8:0)	Unclassified	C31H53O9P	+Na	1.28009	Pos	1.00818	1.11728x10-15	8.76697x10-15	0.410416	2074.86	851.557
623.33114	1506	1506-27	HMDB0266609	PA(8:0/20:4(5Z,7E,11Z,14Z)-OH(9))	Unclassified	C31H53O9P	+Na	1.28009	Pos	1.00818	1.11728x10-15	8.76697x10-15	0.410416	2074.86	851.557
623.33114	1506	1506-28	HMDB0266610	PA(20:4(5Z,7E,11Z,14Z)-OH(9)/8:0)	Unclassified	C31H53O9P	+Na	1.28009	Pos	1.00818	1.11728x10-15	8.76697x10-15	0.410416	2074.86	851.557
623.33114	1506	1506-20	HMDB0266602	PA(20:4(5Z,8Z,11Z,14Z)-OH(16R)/8:0)	Unclassified	C31H53O9P	+Na	1.28009	Pos	1.00818	1.11728x10-15	8.76697x10-15	0.410416	2074.86	851.557
623.33114	1506	1506-19	HMDB0266601	PA(8:0/20:4(5Z,8Z,11Z,14Z)-OH(16R))	Unclassified	C31H53O9P	+Na	1.28009	Pos	1.00818	1.11728x10-15	8.76697x10-15	0.410416	2074.86	851.557
221.11441	393	393-1	HMDB0038440	1-Isothiocyanato-7-(methylthio)heptane	Isothiocyanates	C9H17NS2	+NH4	1.40175	Pos	1.00522	5.55024x10-23	7.18857x10-22	1.31912	2925.75	3859.42
679.55869	2001	2001-2	HMDB0290110	Cer(d20:1/PGD2)	Unclassified	C40H71NO6	+NH4	4.80826	Pos	1.00226	7.33856x10-15	5.22447x10-14	0.390116	1936.2	755.341
679.55869	2001	2001-3	HMDB0290117	Cer(d20:1/20:4(7E,9E,11Z,13E)-3OH(5S,6R,15S))	Unclassified	C40H71NO6	+NH4	4.80826	Pos	1.00226	7.33856x10-15	5.22447x10-14	0.390116	1936.2	755.341
679.55869	2001	2001-1	HMDB0290109	Cer(d20:1/PGE2)	Unclassified	C40H71NO6	+NH4	4.80826	Pos	1.00226	7.33856x10-15	5.22447x10-14	0.390116	1936.2	755.341
m/z, mass-to-charge ratio; VIP, variable importance in projection; FC, fold change; Neg, negative; Pos, positive; SCI, spinal cord injury; PPM, parts per million.
